# Supplementary material for: Nationwide Surveillance on Antimicrobial Resistance Profiles of Enterococcus faecium and Enterococcus faecalis Isolated from Healthy Food Animals in South Korea, 2010 to 2019
Source: MDPI journal article supplement (doi:10.3390/microorganisms9050925), 2021-04-26
Supplement: s1 [file s1]

**Table S1.** *Enterococcus faecium* and *Enterococcus faecalis* isolates recovered from cattle, pigs, and chickens between 2010 and 2019 in Korea.

| Year  | <i>E. faecium</i>       |              |                 |                         |              |                 |                         |              |                 | <i>E. faecalis</i>      |              |                 |                         |              |                 |                         |              |                 |
|-------|-------------------------|--------------|-----------------|-------------------------|--------------|-----------------|-------------------------|--------------|-----------------|-------------------------|--------------|-----------------|-------------------------|--------------|-----------------|-------------------------|--------------|-----------------|
|       | Cattle                  |              |                 | Pigs                    |              |                 | Chickens                |              |                 | Cattle                  |              |                 | Pigs                    |              |                 | Chickens                |              |                 |
|       | No. of slaughter houses | No. of farms | No. of isolates | No. of slaughter houses | No. of farms | No. of isolates | No. of slaughter houses | No. of farms | No. of isolates | No. of slaughter houses | No. of farms | No. of isolates | No. of slaughter houses | No. of farms | No. of isolates | No. of slaughter houses | No. of farms | No. of isolates |
| 2010  | 10                      | 16           | 25              | 17                      | 49           | 60              | 19                      | 77           | 77              | 18                      | 57           | 61              | 19                      | 74           | 88              | 20                      | 157          | 162             |
| 2011  | 17                      | 70           | 72              | 27                      | 114          | 163             | 12                      | 78           | 87              | 24                      | 137          | 152             | 30                      | 142          | 216             | 12                      | 130          | 170             |
| 2012  | 18                      | 48           | 53              | 27                      | 123          | 148             | 12                      | 147          | 168             | 21                      | 75           | 80              | 25                      | 123          | 145             | 12                      | 175          | 213             |
| 2013  | 17                      | 46           | 46              | 28                      | 125          | 127             | 14                      | 132          | 134             | 17                      | 84           | 85              | 27                      | 158          | 166             | 15                      | 192          | 196             |
| 2014  | 14                      | 53           | 73              | 26                      | 116          | 144             | 13                      | 184          | 240             | 17                      | 79           | 98              | 25                      | 129          | 164             | 12                      | 195          | 229             |
| 2015  | 14                      | 50           | 51              | 23                      | 132          | 142             | 11                      | 150          | 166             | 20                      | 101          | 103             | 21                      | 165          | 173             | 12                      | 167          | 175             |
| 2016  | 17                      | 51           | 57              | 23                      | 136          | 152             | 11                      | 139          | 162             | 19                      | 76           | 95              | 24                      | 167          | 200             | 13                      | 159          | 181             |
| 2017  | 17                      | 59           | 60              | 23                      | 127          | 139             | 13                      | 90           | 90              | 13                      | 73           | 76              | 25                      | 147          | 155             | 13                      | 134          | 138             |
| 2018  | 22                      | 76           | 78              | 24                      | 154          | 197             | 19                      | 145          | 168             | 19                      | 79           | 80              | 24                      | 138          | 143             | 21                      | 153          | 154             |
| 2019  | 18                      | 56           | 57              | 24                      | 111          | 113             | 16                      | 107          | 111             | 22                      | 80           | 80              | 22                      | 104          | 106             | 21                      | 130          | 134             |
| Total | 46*                     | 512          | 572             | 59                      | 1045         | 1385            | 40                      | 1086         | 1403            | 53                      | 830          | 910             | 59                      | 1154         | 1556            | 45                      | 1374         | 1752            |

\*No. of different slaughterhouses.

**Table S2.** MIC distribution of the tested antimicrobials against *E. faecium* (n=3360) isolated from cattle, chickens, and pigs between 2010 and 2019 in Korea.

| Antimicrobials  | Source   | MIC (μg/mL) distribution (%) |      |      |      |      |      |      |      |      |      |      |      |     |      | MIC <sub>50</sub> | MIC <sub>90</sub> |      |
|-----------------|----------|------------------------------|------|------|------|------|------|------|------|------|------|------|------|-----|------|-------------------|-------------------|------|
|                 |          | 0.12                         | 0.25 | 0.5  | 1    | 2    | 4    | 8    | 16   | 32   | 64   | 128  | 256  | 512 | 1024 | 2048              |                   |      |
| Ampicillin      | Cattle   |                              |      |      | 74.7 | 21.7 | 2.8  | 0.5  | 0.3  |      |      |      |      |     |      | 1                 | 2                 |      |
|                 | Pigs     |                              |      |      | 67.0 | 23.4 | 9.0  | 0.5  | 0.1  |      |      |      |      |     |      | 1                 | 2                 |      |
|                 | Chickens |                              |      |      | 36.6 | 15.6 | 29.9 | 6.5  | 11.4 |      |      |      |      |     |      | 2                 | 16                |      |
| Chloramphenicol | Cattle   |                              |      |      |      | 4.4  | 34.3 | 57.9 | 1.2  | 2.3  |      |      |      |     | 8    | 8                 |                   |      |
|                 | Pigs     |                              |      |      |      | 1.0  | 33.1 | 56.0 | 3.0  | 6.9  |      |      |      |     | 8    | 8                 |                   |      |
|                 | Chickens |                              |      |      |      | 2.1  | 18.7 | 55.5 | 4.9  | 18.8 |      |      |      |     | 8    | 32                |                   |      |
| Ciprofloxacin   | Cattle   |                              | 2.6  | 14.5 | 33.2 | 26.6 | 17.8 | 4.9  | 0.3  |      |      |      |      | 1   | 4    |                   |                   |      |
|                 | Pigs     |                              | 1.7  | 16.2 | 47.7 | 20.8 | 9.5  | 3.1  | 1.0  |      |      |      |      | 1   | 4    |                   |                   |      |
|                 | Chickens |                              | 0.2  | 3.6  | 11.6 | 16.7 | 26.7 | 16.7 | 24.5 |      |      |      |      | 4   | 16   |                   |                   |      |
| Daptomycin      | Cattle   |                              |      | 4.7  | 2.8  | 21.7 | 65.2 | 4.7  | 0.3  | 0.5  |      |      |      |     | 4    | 4                 |                   |      |
|                 | Pigs     |                              |      | 4.5  | 5.9  | 23.9 | 58.8 | 6.7  | 0    | 0.1  |      |      |      |     | 4    | 4                 |                   |      |
|                 | Chickens |                              |      | 3.8  | 4.8  | 26.4 | 53.8 | 10.4 | 0.4  | 0.3  |      |      |      |     | 4    | 8                 |                   |      |
| Erythromycin    | Cattle   |                              |      |      | 32.5 | 15   | 32.5 | 13.1 | 2.1  | 0    | 4.7  |      |      | 4   | 8    |                   |                   |      |
|                 | Pigs     |                              |      |      | 20.0 | 10.6 | 37.9 | 16.0 | 2.9  | 0.6  | 12.0 |      |      | 4   | 64   |                   |                   |      |
|                 | Chickens |                              |      |      | 21.7 | 9.6  | 9.3  | 6.4  | 1.9  | 1.4  | 49.8 |      |      | 32  | 64   |                   |                   |      |
| Florfenicol     | Cattle   |                              |      |      |      | 43.9 | 54.5 | 0    | 0.2  |      | 1.4  |      |      |     |      | 4                 | 4                 |      |
|                 | Pigs     |                              |      |      |      | 39.1 | 52.3 | 0.2  | 0.9  |      | 7.5  |      |      |     |      | 4                 | 4                 |      |
|                 | Chickens |                              |      |      |      | 28.7 | 51.2 | 1.4  | 0.6  |      | 18   |      |      |     |      | 4                 | 32                |      |
| Gentamicin      | Cattle   |                              |      |      |      |      |      |      |      |      |      | 99.8 | 0    | 0   | 0.2  | 0                 | 128               | 128  |
|                 | Pigs     |                              |      |      |      |      |      |      |      |      |      | 98.6 | 0.7  | 0   | 0.1  | 0.6               | 128               | 128  |
|                 | Chickens |                              |      |      |      |      |      |      |      |      |      | 97.0 | 0.6  | 0.1 | 0.4  | 2.0               | 128               | 128  |
| Kanamycin       | Cattle   |                              |      |      |      |      |      |      |      |      |      | 59.3 | 27.8 | 6.6 | 1.0  | 5.2               | 128               | 512  |
|                 | Pigs     |                              |      |      |      |      |      |      |      |      |      | 53.7 | 30.4 | 6.4 | 0.7  | 8.8               | 128               | 512  |
|                 | Chickens |                              |      |      |      |      |      |      |      |      |      | 56.0 | 29.0 | 4.9 | 0.9  | 9.2               | 128               | 1024 |

|                               |          |           |      |      |      |      |     |     |              |          |           |
|-------------------------------|----------|-----------|------|------|------|------|-----|-----|--------------|----------|-----------|
| Linezolid                     | Cattle   | 0.9       | 8.0  | 82.3 | 8.4  | 0.3  | 0   |     |              | 2        | 2         |
|                               | Pigs     | 0.2       | 6.9  | 80.8 | 12.1 | 0    | 0   |     |              | 2        | 4         |
|                               | Chickens | 0.6       | 11.7 | 66.9 | 15.5 | 4.1  | 1.1 |     |              | 2        | 4         |
| Quinupristin/<br>dalfopristin | Cattle   |           | 30.4 | 60.8 | 8.2  | 0.3  | 0   | 0.2 |              | 2        | 2         |
|                               | Pigs     |           | 19.3 | 68.8 | 10.7 | 1.0  | 0.1 | 0.1 |              | 2        | 4         |
|                               | Chickens |           | 23.3 | 48.7 | 19.2 | 4.1  | 2.1 | 2.6 |              | 2        | 4         |
| Salinomycin                   | Cattle   |           |      | 97.0 | 2.8  | 0.2  | 0   | 0   |              | 2        | 2         |
|                               | Pigs     |           |      | 96.2 | 3.4  | 0.4  | 0   | 0   |              | 2        | 2         |
|                               | Chickens |           |      | 68.0 | 21.0 | 10.8 | 0.2 | 0   |              | 2        | 8         |
| Streptomycin                  | Cattle   |           |      |      |      |      |     |     | 92.7 0.3 0.2 | 1.2 5.6  | 128 256   |
|                               | Pigs     |           |      |      |      |      |     |     | 86.5 0.5 0.6 | 1.2 11.3 | 128 2048  |
|                               | Chickens |           |      |      |      |      |     |     | 62.9 3.0 3.3 | 3.3 27.5 | 128 2048  |
| Tetracycline                  | Cattle   |           |      | 72.9 | 1.0  | 0.2  | 0.7 | 4.0 | 5.1          | 16.1     | 2 128     |
|                               | Pigs     |           |      | 78.3 | 1.2  | 0.4  | 0.8 | 0.8 | 3.0          | 15.5     | 2 128     |
|                               | Chickens |           |      | 37.3 | 0.4  | 0.5  | 0.6 | 1.9 | 6.6          | 52.6     | 128 128   |
| Tigecycline                   | Cattle   | 67.8 25.3 | 6.5  | 0.3  | 0    |      |     |     |              |          | 0.12 0.25 |
|                               | Pigs     | 71.3 22.8 | 5.5  | 0.4  | 0    |      |     |     |              |          | 0.12 0.25 |
|                               | Chickens | 64.9 29.7 | 5.2  | 0.2  | 0.1  |      |     |     |              |          | 0.12 0.25 |
| Tylosin                       | Cattle   |           | 4.4  | 26.7 | 35.3 | 27.4 | 1.2 | 0.2 | 4.7          |          | 4 8       |
|                               | Pigs     |           | 2.9  | 17.5 | 39.9 | 25.4 | 0.4 | 0   | 13.8         |          | 4 64      |
|                               | Chickens |           | 4.3  | 15.0 | 18.2 | 8.3  | 1.2 | 0.3 | 52.7         |          | 64 64     |
| Vancomycin                    | Cattle   |           | 96.7 | 3.1  | 0.2  | 0    | 0   |     |              |          | 2 2       |
|                               | Pigs     |           | 97.9 | 2.1  | 0    | 0    | 0   |     |              |          | 2 2       |
|                               | Chickens |           | 97.6 | 2.4  | 0    | 0.1  | 0   |     |              |          | 2 2       |

The breakpoints of tested antimicrobial agents are indicated by vertical lines.

MIC<sub>50</sub> and MIC<sub>90</sub> are the concentrations (µg/mL) at which 50% and 90% of the isolates were inhibited, respectively.

**Table S3A.** The MIC<sub>50</sub> and MIC<sub>90</sub> of the tested antimicrobials against *E. faecium* (n=572) isolated from cattle between 2010 and 2019 in Korea.

| Antimicrobials            |                   | 2010<br>(n=25) | 2011<br>(n=72) | 2012<br>(n=53) | 2013<br>(n=46) | 2014<br>(n=73) | 2015<br>(n=51) | 2016<br>(n=57) | 2017<br>(n=60) | 2018<br>(n=78) | 2019<br>(n=57) |
|---------------------------|-------------------|----------------|----------------|----------------|----------------|----------------|----------------|----------------|----------------|----------------|----------------|
| Ampicillin                | MIC <sub>50</sub> | 1              | 1              | 1              | 1              | 1              | 1              | 1              | 1              | 1              | 1              |
|                           | MIC <sub>90</sub> | 4              | 2              | 1              | 2              | 2              | 2              | 2              | 2              | 2              | 2              |
|                           | Resistance (%)    | 0              | 0              | 0              | 2.2            | 0              | 0              | 0              | 0              | 0              | 1.8            |
| Chloramphenicol           | MIC <sub>50</sub> | 4              | 4              | 8              | 8              | 8              | 8              | 8              | 4              | 8              | 8              |
|                           | MIC <sub>90</sub> | 8              | 8              | 8              | 8              | 8              | 8              | 8              | 8              | 8              | 8              |
|                           | Resistance (%)    | 8.0            | 1.4            | 0              | 2.2            | 2.7            | 5.9            | 1.8            | 0              | 1.3            | 3.5            |
| Ciprofloxacin             | MIC <sub>50</sub> | 1              | 1              | 2              | 2              | 1              | 1              | 2              | 1              | 1              | 2              |
|                           | MIC <sub>90</sub> | 4              | 2              | 4              | 4              | 4              | 4              | 4              | 4              | 4              | 8              |
|                           | Resistance (%)    | 20.0           | 9.7            | 15.1           | 17.4           | 16.4           | 25.5           | 43.9           | 28.3           | 21.8           | 35.1           |
| Daptomycin                | MIC <sub>50</sub> | 2              | 2              | 4              | 4              | 4              | 4              | 4              | 4              | 4              | 4              |
|                           | MIC <sub>90</sub> | 4              | 4              | 4              | 4              | 4              | 4              | 8              | 4              | 4              | 8              |
|                           | Resistance (%)    | 0              | 2.8            | 1.9            | 6.5            | 2.7            | 3.9            | 19.3           | 1.7            | 5.1            | 10.5           |
| Erythromycin              | MIC <sub>50</sub> | 4              | 2              | 2              | 4              | 2              | 2              | 2              | 4              | 4              | 4              |
|                           | MIC <sub>90</sub> | 64             | 8              | 8              | 4              | 4              | 4              | 4              | 8              | 8              | 8              |
|                           | Resistance (%)    | 40.0           | 30.6           | 13.2           | 6.5            | 6.8            | 9.8            | 8.8            | 30             | 34.6           | 21.1           |
| Florfenicol               | MIC <sub>50</sub> | 2              | 2              | 4              | 4              | 4              | 4              | 4              | 2              | 4              | 4              |
|                           | MIC <sub>90</sub> | 4              | 2              | 4              | 4              | 4              | 4              | 4              | 4              | 4              | 4              |
|                           | Resistance (%)    | 8.0            | 2.8            | 0              | 0              | 2.7            | 0              | 0              | 1.7            | 1.3            | 1.8            |
| Gentamicin                | MIC <sub>50</sub> | 128            | 128            | 128            | 128            | 128            | 128            | 128            | 128            | 128            | 128            |
|                           | MIC <sub>90</sub> | 128            | 128            | 128            | 128            | 128            | 128            | 128            | 128            | 128            | 128            |
|                           | Resistance (%)    | 4.0            | 0              | 0              | 0              | 0              | 0              | 0              | 0              | 0              | 0              |
| Kanamycin                 | MIC <sub>50</sub> | 128            | 256            | 128            | 128            | 256            | 128            | 128            | 128            | 128            | 128            |
|                           | MIC <sub>90</sub> | 2048           | 2048           | 512            | 512            | 256            | 512            | 256            | 256            | 256            | 256            |
|                           | Resistance (%)    | 12.0           | 26.4           | 1.9            | 8.7            | 2.7            | 3.9            | 0              | 3.3            | 1.3            | 3.5            |
| Linezolid                 | MIC <sub>50</sub> | 2              | 2              | 2              | 2              | 2              | 2              | 2              | 2              | 2              | 2              |
|                           | MIC <sub>90</sub> | 2              | 2              | 2              | 4              | 2              | 4              | 4              | 2              | 4              | 2              |
|                           | Resistance (%)    | 0              | 0              | 0              | 0              | 1.4            | 0              | 1.8            | 0              | 0              | 0              |
| Quinupristin/dalfopristin | MIC <sub>50</sub> | 2              | 2              | 2              | 2              | 2              | 2              | 2              | 2              | 2              | 2              |
|                           | MIC <sub>90</sub> | 4              | 2              | 4              | 4              | 2              | 4              | 2              | 2              | 2              | 4              |
|                           | Resistance (%)    | 16.0           | 1.4            | 17.0           | 19.6           | 8.2            | 15.7           | 0              | 1.7            | 6.4            | 12.3           |
| Salinomycin               | MIC <sub>50</sub> | 2              | 2              | 2              | 2              | 2              | 2              | 2              | 2              | 2              | 2              |
|                           | MIC <sub>90</sub> | 4              | 2              | 2              | 2              | 4              | 2              | 2              | 2              | 2              | 2              |
|                           | Resistance (%)    | 0              | 0              | 1.9            | 0              | 0              | 0              | 0              | 0              | 0              | 0              |

|              |                   |       |       |       |       |       |      |      |      |      |      |
|--------------|-------------------|-------|-------|-------|-------|-------|------|------|------|------|------|
| Streptomycin | MIC <sub>50</sub> | 128   | 128   | 128   | 1     | 128   | 128  | 128  | 128  | 128  | 128  |
|              | MIC <sub>90</sub> | 2048  | 1024  | 128   | 2     | 128   | 256  | 128  | 128  | 128  | 128  |
|              | Resistance (%)    | 32.0  | 11.1  | 5.7   | 6.5   | 8.2   | 9.8  | 1.8  | 1.7  | 1.3  | 5.3  |
| Tetracycline | MIC <sub>50</sub> | 64    | 4     | 2     | 2     | 2     | 2    | 2    | 2    | 2    | 2    |
|              | MIC <sub>90</sub> | 128   | 128   | 128   | 64    | 128   | 128  | 128  | 64   | 2    | 64   |
|              | Resistance (%)    | 64.0  | 47.2  | 30.2  | 15.2  | 26.0  | 21.6 | 35.1 | 16.7 | 9.0  | 14.0 |
| Tigecycline  | MIC <sub>50</sub> | 0.125 | 0.125 | 0.125 | 0.125 | 0.125 | 0.25 | 0.25 | 0.12 | 0.25 | 0.12 |
|              | MIC <sub>90</sub> | 0.25  | 0.125 | 0.125 | 0.125 | 0.25  | 0.25 | 0.5  | 0.5  | 0.5  | 0.5  |
|              | Resistance (%)    | 4.0   | 1.4   | 1.9   | 0     | 1.4   | 7.8  | 10.5 | 11.7 | 15.4 | 10.5 |
| Tylosin      | MIC <sub>50</sub> | 4     | 4     | 4     | 8     | 4     | 4    | 4    | 4    | 4    | 4    |
|              | MIC <sub>90</sub> | 64    | 8     | 8     | 8     | 8     | 8    | 8    | 8    | 8    | 8    |
|              | Resistance (%)    | 32.0  | 8.3   | 3.8   | 4.3   | 4.1   | 2.0  | 1.8  | 3.3  | 1.3  | 3.5  |
| Vancomycin   | MIC <sub>50</sub> | 2     | 2     | 2     | 2     | 2     | 2    | 2    | 2    | 2    | 2    |
|              | MIC <sub>90</sub> | 2     | 2     | 2     | 2     | 4     | 2    | 2    | 2    | 2    | 2    |
|              | Resistance (%)    | 0     | 0     | 0     | 0     | 0     | 0    | 0    | 0    | 0    | 0    |

MIC<sub>50</sub> and MIC<sub>90</sub> are the concentrations (µg/mL) at which 50% and 90% of the isolates were inhibited, respectively.

**Table S3B.** The MIC<sub>50</sub> and MIC<sub>90</sub> of the tested antimicrobials against *E. faecium* (n=1385) isolated from pigs between 2010 and 2019 in Korea.

| Antimicrobials            |                   | 2010<br>(n=60) | 2011<br>(n=163) | 2012<br>(n=148) | 2013<br>(n=127) | 2014<br>(n=144) | 2015<br>(n=142) | 2016<br>(n=152) | 2017<br>(n=139) | 2018<br>(n=197) | 2019<br>(n=113) |
|---------------------------|-------------------|----------------|-----------------|-----------------|-----------------|-----------------|-----------------|-----------------|-----------------|-----------------|-----------------|
| Ampicillin                | MIC <sub>50</sub> | 1              | 1               | 1               | 1               | 1               | 1               | 1               | 2               | 1               | 1               |
|                           | MIC <sub>90</sub> | 4              | 2               | 2               | 2               | 4               | 4               | 4               | 2               | 2               | 4               |
|                           | Resistance (%)    | 0              | 0               | 0               | 0.8             | 0               | 0               | 0               | 0               | 0               | 0               |
| Chloramphenicol           | MIC <sub>50</sub> | 4              | 4               | 8               | 8               | 8               | 8               | 8               | 4               | 8               | 8               |
|                           | MIC <sub>90</sub> | 8              | 8               | 8               | 8               | 32              | 32              | 16              | 16              | 8               | 8               |
|                           | Resistance (%)    | 5.0            | 2.5             | 5.4             | 3.9             | 11.1            | 12.0            | 6.6             | 7.2             | 7.1             | 7.1             |
| Ciprofloxacin             | MIC <sub>50</sub> | 1              | 1               | 1               | 1               | 1               | 1               | 2               | 1               | 1               | 1               |
|                           | MIC <sub>90</sub> | 4              | 2               | 4               | 4               | 4               | 2               | 4               | 4               | 4               | 4               |
|                           | Resistance (%)    | 23.3           | 6.7             | 12.2            | 11.0            | 11.8            | 9.2             | 29.6            | 12.9            | 12.2            | 13.3            |
| Daptomycin                | MIC <sub>50</sub> | 2              | 2               | 4               | 4               | 4               | 4               | 4               | 4               | 4               | 4               |
|                           | MIC <sub>90</sub> | 4              | 4               | 4               | 4               | 4               | 4               | 8               | 4               | 4               | 8               |
|                           | Resistance (%)    | 0              | 0               | 8.1             | 3.1             | 2.8             | 7.7             | 25.7            | 1.4             | 5.6             | 10.6            |
| Erythromycin              | MIC <sub>50</sub> | 4              | 4               | 4               | 4               | 4               | 4               | 4               | 4               | 4               | 4               |
|                           | MIC <sub>90</sub> | 64             | 8               | 64              | 64              | 64              | 64              | 64              | 64              | 64              | 64              |
|                           | Resistance (%)    | 33.3           | 25.8            | 16.9            | 12.6            | 15.3            | 34.5            | 43.4            | 38.8            | 48.2            | 41.6            |
| Florfenicol               | MIC <sub>50</sub> | 2              | 2               | 4               | 4               | 4               | 4               | 4               | 2               | 4               | 4               |
|                           | MIC <sub>90</sub> | 4              | 2               | 4               | 4               | 4               | 32              | 8               | 16              | 4               | 4               |
|                           | Resistance (%)    | 10.0           | 4.9             | 8.1             | 3.9             | 8.3             | 13.4            | 9.2             | 10.8            | 8.6             | 7.1             |
| Gentamicin                | MIC <sub>50</sub> | 128            | 128             | 128             | 128             | 128             | 128             | 128             | 128             | 128             | 128             |
|                           | MIC <sub>90</sub> | 128            | 128             | 128             | 128             | 128             | 128             | 128             | 128             | 128             | 128             |
|                           | Resistance (%)    | 0              | 1.2             | 0.7             | 1.6             | 1.4             | 0               | 1.3             | 0               | 0               | 0.9             |
| Kanamycin                 | MIC <sub>50</sub> | 128            | 128             | 128             | 128             | 256             | 128             | 256             | 128             | 128             | 128             |
|                           | MIC <sub>90</sub> | 2048           | 1024            | 512             | 512             | 512             | 512             | 1024            | 256             | 512             | 2048            |
|                           | Resistance (%)    | 21.7           | 10.4            | 7.4             | 9.4             | 8.3             | 7.7             | 11.8            | 6.5             | 8.6             | 10.6            |
| Linezolid                 | MIC <sub>50</sub> | 2              | 2               | 2               | 2               | 2               | 2               | 2               | 2               | 2               | 2               |
|                           | MIC <sub>90</sub> | 2              | 2               | 4               | 4               | 2               | 4               | 4               | 2               | 2               | 2               |
|                           | Resistance (%)    | 0              | 0               | 0               | 0               | 0               | 0               | 0               | 0               | 0               | 0               |
| Quinupristin/dalfopristin | MIC <sub>50</sub> | 2              | 2               | 2               | 2               | 2               | 2               | 2               | 2               | 2               | 2               |
|                           | MIC <sub>90</sub> | 2              | 2               | 4               | 4               | 4               | 4               | 2               | 2               | 4               | 4               |
|                           | Resistance (%)    | 8.3            | 3.1             | 25.0            | 11.8            | 11.1            | 17.6            | 9.2             | 5.0             | 10.7            | 17.7            |
| Salinomycin               | MIC <sub>50</sub> | 2              | 2               | 2               | 2               | 2               | 2               | 2               | 2               | 2               | 2               |
|                           | MIC <sub>90</sub> | 2              | 2               | 2               | 2               | 4               | 2               | 4               | 2               | 2               | 2               |

|              |                   |       |       |       |       |       |       |       |      |      |      |
|--------------|-------------------|-------|-------|-------|-------|-------|-------|-------|------|------|------|
|              | Resistance (%)    | 0     | 0     | 0.7   | 0.8   | 0.7   | 0     | 0.7   | 0    | 0.5  | 0    |
| Streptomycin | MIC <sub>50</sub> | 128   | 128   | 128   | 1     | 128   | 128   | 128   | 128  | 128  | 128  |
|              | MIC <sub>90</sub> | 2048  | 256   | 2048  | 2     | 1024  | 2048  | 2048  | 2048 | 1024 | 2048 |
|              | Resistance (%)    | 28.3  | 7.4   | 12.8  | 11.8  | 11.1  | 14.8  | 12.5  | 12.2 | 10.7 | 13.3 |
| Tetracycline | MIC <sub>50</sub> | 2     | 2     | 2     | 2     | 2     | 2     | 2     | 2    | 2    | 2    |
|              | MIC <sub>90</sub> | 128   | 128   | 128   | 128   | 128   | 128   | 128   | 128  | 64   | 128  |
|              | Resistance (%)    | 36.7  | 19.0  | 23.0  | 15.0  | 19.4  | 21.1  | 27.0  | 17.3 | 16.2 | 15.9 |
| Tigecycline  | MIC <sub>50</sub> | 0.125 | 0.125 | 0.125 | 0.125 | 0.125 | 0.125 | 0.125 | 0.12 | 0.25 | 0.12 |
|              | MIC <sub>90</sub> | 0.25  | 0.125 | 0.25  | 0.125 | 0.25  | 0.25  | 0.25  | 0.25 | 0.5  | 0.25 |
|              | Resistance (%)    | 10.0  | 0.6   | 2.0   | 3.1   | 0.7   | 2.8   | 7.2   | 5.8  | 17.3 | 8.0  |
| Tylosin      | MIC <sub>50</sub> | 4     | 4     | 4     | 4     | 4     | 4     | 4     | 4    | 4    | 4    |
|              | MIC <sub>90</sub> | 64    | 8     | 64    | 64    | 64    | 64    | 64    | 64   | 64   | 64   |
|              | Resistance (%)    | 23.3  | 7.4   | 12.8  | 11.0  | 12.5  | 16.2  | 14.5  | 13.7 | 17.3 | 14.2 |
| Vancomycin   | MIC <sub>50</sub> | 2     | 2     | 2     | 2     | 2     | 2     | 2     | 2    | 2    | 2    |
|              | MIC <sub>90</sub> | 2     | 2     | 2     | 2     | 2     | 2     | 2     | 2    | 2    | 2    |
|              | Resistance (%)    | 0     | 0     | 0     | 0     | 0     | 0     | 0     | 0    | 0    | 0    |

MIC<sub>50</sub> and MIC<sub>90</sub> are the concentrations (µg/mL) at which 50% and 90% of the isolates were inhibited, respectively.

**Table S3C.** The MIC<sub>50</sub> and MIC<sub>90</sub> of the tested antimicrobials against *E. faecium* isolated from chickens (n=1403) between 2010 and 2019 in Korea.

| Antimicrobials            |                   | 2010<br>(n=77) | 2011<br>(n=87) | 2012<br>(n=168) | 2013<br>(n=134) | 2014<br>(n=240) | 2015<br>(n=166) | 2016<br>(n=162) | 2017<br>(n=90) | 2018<br>(n=168) | 2019<br>(n=111) |
|---------------------------|-------------------|----------------|----------------|-----------------|-----------------|-----------------|-----------------|-----------------|----------------|-----------------|-----------------|
| Ampicillin                | MIC <sub>50</sub> | 4              | 2              | 2               | 2               | 4               | 4               | 2               | 2              | 2               | 4               |
|                           | MIC <sub>90</sub> | 16             | 16             | 8               | 16              | 8               | 16              | 8               | 16             | 16              | 16              |
|                           | Resistance (%)    | 13.0           | 12.6           | 9.5             | 10.4            | 8.3             | 12.7            | 4.3             | 12.2           | 13.7            | 24.3            |
| Chloramphenicol           | MIC <sub>50</sub> | 8              | 8              | 8               | 8               | 8               | 8               | 8               | 4              | 8               | 8               |
|                           | MIC <sub>90</sub> | 32             | 32             | 32              | 32              | 32              | 32              | 32              | 32             | 32              | 32              |
|                           | Resistance (%)    | 22.1           | 19.5           | 16.1            | 15.7            | 19.2            | 14.5            | 14.8            | 12.2           | 26.2            | 29.7            |
| Ciprofloxacin             | MIC <sub>50</sub> | 4              | 4              | 4               | 8               | 4               | 4               | 4               | 4              | 4               | 4               |
|                           | MIC <sub>90</sub> | 16             | 16             | 16              | 16              | 16              | 16              | 16              | 16             | 16              | 16              |
|                           | Resistance (%)    | 74.0           | 75.9           | 66.7            | 70.9            | 68.3            | 78.9            | 65.4            | 62.2           | 56.5            | 64.0            |
| Daptomycin                | MIC <sub>50</sub> | 2              | 2              | 4               | 4               | 4               | 4               | 4               | 2              | 4               | 4               |
|                           | MIC <sub>90</sub> | 4              | 4              | 8               | 4               | 4               | 8               | 8               | 4              | 8               | 8               |
|                           | Resistance (%)    | 0              | 1.1            | 13.1            | 8.2             | 9.6             | 11.4            | 19.8            | 6.7            | 11.9            | 19.8            |
| Erythromycin              | MIC <sub>50</sub> | 64             | 64             | 64              | 64              | 64              | 32              | 8               | 4              | 4               | 16              |
|                           | MIC <sub>90</sub> | 64             | 64             | 64              | 64              | 64              | 64              | 64              | 64             | 64              | 64              |
|                           | Resistance (%)    | 84.4           | 74.7           | 55.4            | 67.2            | 59.6            | 57.8            | 53.7            | 50.0           | 45.2            | 67.6            |
| Florfenicol               | MIC <sub>50</sub> | 2              | 2              | 4               | 4               | 4               | 4               | 4               | 2              | 4               | 4               |
|                           | MIC <sub>90</sub> | 32             | 32             | 32              | 32              | 32              | 32              | 32              | 32             | 32              | 32              |
|                           | Resistance (%)    | 24.7           | 21.8           | 14.9            | 14.2            | 18.8            | 15.1            | 13.0            | 12.2           | 26.2            | 30.6            |
| Gentamicin                | MIC <sub>50</sub> | 128            | 128            | 128             | 128             | 128             | 128             | 128             | 128            | 128             | 128             |
|                           | MIC <sub>90</sub> | 1024           | 128            | 128             | 128             | 128             | 128             | 128             | 128            | 128             | 128             |
|                           | Resistance (%)    | 10.4           | 1.1            | 3.6             | 0               | 1.7             | 2.4             | 1.9             | 2.2            | 0               | 4.5             |
| Kanamycin                 | MIC <sub>50</sub> | 128            | 128            | 256             | 128             | 256             | 128             | 256             | 128            | 128             | 128             |
|                           | MIC <sub>90</sub> | 2048           | 256            | 2048            | 512             | 2048            | 1024            | 512             | 256            | 256             | 512             |
|                           | Resistance (%)    | 20.8           | 3.4            | 12.5            | 9.7             | 11.7            | 11.4            | 6.2             | 8.9            | 7.7             | 9.9             |
| Linezolid                 | MIC <sub>50</sub> | 1              | 2              | 2               | 2               | 2               | 2               | 2               | 2              | 2               | 2               |
|                           | MIC <sub>90</sub> | 4              | 4              | 4               | 4               | 4               | 4               | 4               | 2              | 4               | 8               |
|                           | Resistance (%)    | 3.9            | 0              | 1.2             | 1.5             | 7.1             | 6.6             | 6.8             | 3.3            | 6.5             | 11.7            |
| Quinupristin/dalfopristin | MIC <sub>50</sub> | 2              | 2              | 2               | 2               | 2               | 2               | 2               | 2              | 2               | 2               |
|                           | MIC <sub>90</sub> | 16             | 32             | 8               | 8               | 8               | 8               | 4               | 2              | 4               | 4               |
|                           | Resistance (%)    | 39.0           | 26.4           | 44.0            | 34.3            | 29.2            | 34.3            | 24.1            | 6.7            | 14.9            | 20.7            |
| Salinomycin               | MIC <sub>50</sub> | 2              | 2              | 2               | 2               | 2               | 2               | 2               | 2              | 2               | 2               |



|              |                   |       |       |       |       |       |      |       |      |      |      |
|--------------|-------------------|-------|-------|-------|-------|-------|------|-------|------|------|------|
|              | MIC <sub>90</sub> | 4     | 4     | 8     | 4     | 8     | 8    | 8     | 4    | 4    | 4    |
|              | Resistance (%)    | 2.6   | 6.9   | 11.3  | 3.7   | 24.6  | 17.5 | 13.0  | 2.2  | 3.0  | 5.4  |
| Streptomycin | MIC <sub>50</sub> | 1024  | 512   | 128   | 2     | 128   | 128  | 128   | 128  | 128  | 128  |
|              | MIC <sub>90</sub> | 2048  | 2048  | 2048  | 16    | 2048  | 2048 | 2048  | 2048 | 2048 | 2048 |
|              | Resistance (%)    | 50.6  | 46.0  | 41.1  | 44.0  | 30.4  | 38.0 | 16.7  | 23.3 | 13.1 | 17.1 |
| Tetracycline | MIC <sub>50</sub> | 128   | 128   | 128   | 128   | 128   | 128  | 4     | 32   | 2    | 2    |
|              | MIC <sub>90</sub> | 128   | 128   | 128   | 128   | 128   | 128  | 128   | 128  | 128  | 128  |
|              | Resistance (%)    | 87.0  | 82.8  | 70.8  | 77.6  | 62.9  | 63.9 | 48.8  | 52.2 | 42.9 | 44.1 |
| Tigecycline  | MIC <sub>50</sub> | 0.125 | 0.125 | 0.125 | 0.125 | 0.125 | 0.25 | 0.125 | 0.12 | 0.25 | 0.12 |
|              | MIC <sub>90</sub> | 0.25  | 0.25  | 0.25  | 0.25  | 0.25  | 0.25 | 0.25  | 0.25 | 0.25 | 0.25 |
|              | Resistance (%)    | 3.9   | 1.1   | 1.8   | 3.0   | 4.6   | 9.6  | 9.3   | 10.0 | 5.4  | 5.4  |
| Tylosin      | MIC <sub>50</sub> | 64    | 64    | 64    | 64    | 64    | 64   | 8     | 4    | 4    | 8    |
|              | MIC <sub>90</sub> | 64    | 64    | 64    | 64    | 64    | 64   | 64    | 64   | 64   | 64   |
|              | Resistance (%)    | 84.4  | 74.7  | 51.8  | 64.9  | 58.8  | 51.2 | 38.3  | 41.1 | 35.7 | 48.6 |
| Vancomycin   | MIC <sub>50</sub> | 2     | 2     | 2     | 2     | 2     | 2    | 2     | 2    | 2    | 2    |
|              | MIC <sub>90</sub> | 2     | 2     | 2     | 2     | 2     | 2    | 2     | 2    | 2    | 2    |
|              | Resistance (%)    | 0     | 0     | 0     | 0     | 0     | 0    | 0     | 0    | 0    | 0    |

MIC<sub>50</sub> and MIC<sub>90</sub> are the concentrations (µg/mL) at which 50% and 90% of the isolates were inhibited, respectively.

**Table S4.** MIC distribution of the tested antimicrobials against *E. faecalis* isolated from cattle, chickens, and pigs between 2010 and 2019 in Korea (n=4218).

| Antimicrobials  | Source   | MIC (µg/mL) distribution (%) |      |      |      |      |      |      |      |      |      |      |     |     |      | MIC <sub>50</sub> | MIC <sub>90</sub> |
|-----------------|----------|------------------------------|------|------|------|------|------|------|------|------|------|------|-----|-----|------|-------------------|-------------------|
|                 |          | 0.12                         | 0.25 | 0.5  | 1    | 2    | 4    | 8    | 16   | 32   | 64   | 128  | 256 | 512 | 1024 | 2048              |                   |
| Ampicillin      | Cattle   |                              |      |      | 89.8 | 10.2 | 0    | 0    | 0    |      |      |      |     |     |      | 1                 | 2                 |
|                 | Pigs     |                              |      |      | 89.9 | 10.0 | 0.1  | 0    | 0.1  |      |      |      |     |     |      | 1                 | 2                 |
|                 | Chickens |                              |      |      | 93.4 | 6.4  | 0    | 0.1  | 0.1  |      |      |      |     |     |      | 1                 | 1                 |
| Chloramphenicol | Cattle   |                              |      |      |      | 1.1  | 24.3 | 60.3 | 2.2  | 12.1 |      |      |     |     |      | 8                 | 32                |
|                 | Pigs     |                              |      |      |      | 0.4  | 9.8  | 31.4 | 8.4  | 50.0 |      |      |     |     |      | 16                | 32                |
|                 | Chickens |                              |      |      |      | 0.5  | 14.1 | 60.8 | 3.6  | 20.9 |      |      |     |     |      | 8                 | 32                |
| Ciprofloxacin   | Cattle   |                              | 0.3  | 5.1  | 45.7 | 41.0 | 2.5  | 0    | 5.4  |      |      |      |     |     |      | 1                 | 2                 |
|                 | Pigs     |                              | 0.3  | 4.7  | 54.6 | 26.7 | 4.6  | 1.1  | 8.0  |      |      |      |     |     |      | 1                 | 4                 |
|                 | Chickens |                              | 0.1  | 2.3  | 33.2 | 15.8 | 2.3  | 0.3  | 46.0 |      |      |      |     |     |      | 2                 | 16                |
| Daptomycin      | Cattle   |                              |      | 3.7  | 33.6 | 47.9 | 13.4 | 1.0  | 0    | 0.3  |      |      |     |     |      | 2                 | 4                 |
|                 | Pigs     |                              |      | 2.2  | 36.8 | 52.1 | 8.4  | 0.3  | 0.1  | 0.3  |      |      |     |     |      | 2                 | 2                 |
|                 | Chickens |                              |      | 5.0  | 38.0 | 51.1 | 5.3  | 0.2  | 0    | 0.3  |      |      |     |     |      | 2                 | 2                 |
| Erythromycin    | Cattle   |                              |      |      | 51.2 | 25.8 | 2.5  | 0.8  | 0.8  | 0.8  | 18.1 |      |     |     |      | 1                 | 64                |
|                 | Pigs     |                              |      |      | 22.8 | 8.0  | 2.2  | 5.1  | 4.6  | 1.7  | 55.7 |      |     |     |      | 64                | 64                |
|                 | Chickens |                              |      |      | 26.3 | 8.8  | 1.9  | 4.5  | 6.0  | 3.9  | 48.6 |      |     |     |      | 32                | 64                |
| Florfenicol     | Cattle   |                              |      |      | 46.6 | 47.7 | 1.2  | 2.1  | 2.4  |      |      |      |     |     |      | 4                 | 4                 |
|                 | Pigs     |                              |      |      | 21.7 | 29.7 | 2.9  | 17.7 | 28.0 |      |      |      |     |     |      | 4                 | 32                |
|                 | Chickens |                              |      |      | 34.2 | 50.1 | 1.5  | 2.3  | 12.0 |      |      |      |     |     |      | 4                 | 32                |
| Gentamicin      | Cattle   |                              |      |      |      |      |      |      |      |      | 91.1 | 1.0  | 0.4 | 2.0 | 5.5  | 128               | 128               |
|                 | Pigs     |                              |      |      |      |      |      |      |      |      | 75.4 | 3.3  | 2.4 | 5.6 | 13.3 | 128               | 2048              |
|                 | Chickens |                              |      |      |      |      |      |      |      |      | 88.7 | 0.6  | 0.3 | 1.1 | 9.2  | 128               | 1024              |
| Kanamycin       | Cattle   |                              |      |      |      |      |      |      |      |      | 71.3 | 14.9 | 0.3 | 0.1 | 13.3 | 128               | 2048              |
|                 | Pigs     |                              |      |      |      |      |      |      |      |      | 44.0 | 11.2 | 0.5 | 0.3 | 44.0 | 256               | 2048              |
|                 | Chickens |                              |      |      |      |      |      |      |      |      | 64.7 | 13.6 | 0.3 | 0.6 | 20.8 | 128               | 2048              |
| Linezolid       | Cattle   |                              | 0.4  | 27.6 | 70.2 | 1.5  | 0.2  | 0    |      |      |      |      |     |     |      | 2                 | 2                 |
|                 | Pigs     |                              | 0.4  | 22.2 | 63.8 | 12.1 | 1.2  | 0.2  |      |      |      |      |     |     |      | 2                 | 4                 |
|                 | Chickens |                              | 1.3  | 33.3 | 57.9 | 6.0  | 0.7  | 0.4  |      |      |      |      |     |     |      | 2                 | 2                 |

|              |          |      |      |      |     |     |     |     |      |      |     |      |       |      |
|--------------|----------|------|------|------|-----|-----|-----|-----|------|------|-----|------|-------|------|
| Salinomycin  | Cattle   | 98.8 |      | 1.2  | 0   |     | 0   | 0   | 2    |      |     |      | 2     |      |
|              | Pigs     | 99.3 |      | 0.7  | 0   |     | 0   | 0   | 2    |      |     |      | 2     |      |
|              | Chickens | 83.0 |      | 14.2 | 2.8 |     | 0   | 0   | 2    |      |     |      | 4     |      |
| Streptomycin | Cattle   | 79.7 |      |      |     |     |     |     | 1.0  | 0.5  | 1.4 | 17.4 | 128   | 2048 |
|              | Pigs     | 47.2 |      |      |     |     |     |     | 1.2  | 0.7  | 1.8 | 49.1 | 1024  | 2048 |
|              | Chickens | 65.2 |      |      |     |     |     |     | 1.4  | 1.5  | 2.1 | 29.7 | 128   | 2048 |
| Tetracycline | Cattle   | 57.5 |      | 0.8  | 0   | 0.7 |     | 3.2 | 19.3 | 18.6 | 2   |      |       | 128  |
|              | Pigs     | 21.2 |      | 0.3  | 0.2 | 0.6 |     | 2.1 | 24.7 | 50.9 | 128 |      |       | 128  |
|              | Chickens | 23.1 |      | 0.6  | 0.2 | 1.6 |     | 3.8 | 11.6 | 59.1 | 128 |      |       | 128  |
| Tigecycline  | Cattle   | 64.5 | 28.0 | 6.7  | 0.8 | 0   |     |     |      |      |     |      | 0.12  | 0.25 |
|              | Pigs     | 59.7 | 28.8 | 10.0 | 1.5 | 0   |     |     |      |      |     |      | 0.12  | 0.5  |
|              | Chickens | 58.6 | 30.9 | 10.0 | 0.5 | 0.1 |     |     |      |      |     |      | 0.125 | 0.5  |
| Tylosin      | Cattle   | 20.7 |      | 54.7 | 4.3 | 0.2 | 0   | 0.1 |      | 20.0 | 2   |      |       | 64   |
|              | Pigs     | 8.3  |      | 22.1 | 2.1 | 0.6 | 0.4 | 1.0 |      | 65.6 | 64  |      |       | 64   |
|              | Chickens | 7.6  |      | 26.4 | 1.9 | 0.2 | 0.2 | 0.3 |      | 63.4 | 64  |      |       | 64   |
| Vancomycin   | Cattle   | 95.7 |      | 4.3  | 0   | 0   | 0   |     |      |      | 2   |      |       | 2    |
|              | Pigs     | 92.3 |      | 7.6  | 0.1 | 0   | 0   |     |      |      | 2   |      |       | 2    |
|              | Chickens | 91.0 |      | 9.0  | 0   | 0   | 0   |     |      |      | 2   |      |       | 2    |

The breakpoints of tested antimicrobial agents are indicated by vertical lines.

MIC<sub>50</sub> and MIC<sub>90</sub> are the concentrations at which 50% and 90% of the isolates were inhibited, respectively.

**Table S5A.** The MIC<sub>50</sub> and MIC<sub>90</sub> of the tested antimicrobials against *E. faecalis* (n= 910) isolated from cattle between 2010 and 2019 in Korea.

| Antimicrobials  |                   | 2010<br>(n=61) | 2011<br>(n=152) | 2012<br>(n=80) | 2013<br>(n=85) | 2014<br>(n=99) | 2015<br>(n=102) | 2016<br>(n=95) | 2017<br>(n=76) | 2018<br>(n=80) | 2019<br>(n=80) |
|-----------------|-------------------|----------------|-----------------|----------------|----------------|----------------|-----------------|----------------|----------------|----------------|----------------|
| Ampicillin      | MIC <sub>50</sub> | 1              | 1               | 1              | 1              | 1              | 1               | 1              | 1              | 1              | 1              |
|                 | MIC <sub>90</sub> | 1              | 1               | 1              | 2              | 2              | 2               | 1              | 1              | 1              | 1              |
|                 | Resistance (%)    | 0              | 0               | 0              | 0              | 0              | 0               | 0              | 0              | 0              | 0              |
| Chloramphenicol | MIC <sub>50</sub> | 4              | 4               | 8              | 8              | 8              | 8               | 8              | 8              | 8              | 8              |
|                 | MIC <sub>90</sub> | 32             | 32              | 32             | 16             | 32             | 32              | 32             | 16             | 8              | 32             |
|                 | Resistance (%)    | 16.4           | 15.1            | 16.3           | 3.5            | 11.1           | 19.6            | 10.5           | 7.9            | 6.3            | 11.3           |
| Ciprofloxacin   | MIC <sub>50</sub> | 1              | 1               | 2              | 1              | 2              | 2               | 2              | 1              | 1              | 2              |
|                 | MIC <sub>90</sub> | 2              | 2               | 2              | 2              | 2              | 4               | 4              | 2              | 2              | 2              |
|                 | Resistance (%)    | 0              | 9.9             | 8.8            | 9.4            | 8.1            | 12.7            | 13.7           | 3.9            | 3.8            | 2.5            |
| Daptomycin      | MIC <sub>50</sub> | 1              | 1               | 2              | 2              | 2              | 2               | 2              | 2              | 2              | 2              |
|                 | MIC <sub>90</sub> | 2              | 2               | 4              | 2              | 4              | 4               | 4              | 4              | 4              | 4              |
|                 | Resistance (%)    | 0              | 0.7             | 1.3            | 0              | 2.0            | 2.0             | 3.2            | 1.3            | 1.3            | 1.3            |
| Erythromycin    | MIC <sub>50</sub> | 2              | 1               | 1              | 2              | 1              | 1               | 2              | 2              | 2              | 2              |
|                 | MIC <sub>90</sub> | 64             | 64              | 64             | 64             | 64             | 64              | 64             | 64             | 64             | 64             |
|                 | Resistance (%)    | 24.6           | 32.2            | 23.8           | 17.6           | 13.1           | 19.6            | 23.2           | 11.8           | 16.3           | 13.8           |
| Florfenicol     | MIC <sub>50</sub> | 2              | 2               | 4              | 4              | 4              | 4               | 4              | 2              | 2              | 2              |
|                 | MIC <sub>90</sub> | 2              | 2               | 4              | 4              | 4              | 4               | 8              | 4              | 4              | 4              |
|                 | Resistance (%)    | 0              | 0.7             | 6.3            | 3.5            | 3.0            | 8.8             | 8.4            | 5.3            | 3.8            | 6.3            |
| Gentamicin      | MIC <sub>50</sub> | 128            | 128             | 128            | 128            | 128            | 128             | 128            | 128            | 128            | 128            |
|                 | MIC <sub>90</sub> | 2048           | 256             | 256            | 128            | 128            | 128             | 128            | 128            | 128            | 128            |
|                 | Resistance (%)    | 13.1           | 8.6             | 8.8            | 7.1            | 9.1            | 5.9             | 7.4            | 2.6            | 5.0            | 7.5            |
| Kanamycin       | MIC <sub>50</sub> | 128            | 128             | 128            | 128            | 256            | 128             | 256            | 128            | 128            | 128            |
|                 | MIC <sub>90</sub> | 2048           | 2048            | 2048           | 2048           | 2048           | 2048            | 2048           | 256            | 2048           | 2048           |
|                 | Resistance (%)    | 14.8           | 15.8            | 16.3           | 15.3           | 11.1           | 10.8            | 18.9           | 5.3            | 12.5           | 11.3           |
| Linezolid       | MIC <sub>50</sub> | 1              | 1               | 2              | 2              | 2              | 2               | 2              | 2              | 2              | 2              |
|                 | MIC <sub>90</sub> | 1              | 2               | 2              | 2              | 2              | 2               | 2              | 2              | 2              | 2              |
|                 | Resistance (%)    | 0              | 0               | 0              | 0              | 0              | 2               | 0              | 0              | 0              | 0              |
| Salinomycin     | MIC <sub>50</sub> | 2              | 2               | 2              | 2              | 2              | 2               | 2              | 2              | 2              | 2              |
|                 | MIC <sub>90</sub> | 2              | 2               | 2              | 2              | 2              | 2               | 2              | 2              | 2              | 2              |
|                 | Resistance (%)    | 0              | 0               | 0              | 0              | 0              | 0               | 0              | 0              | 0              | 0              |

|              |                   |       |       |       |       |       |       |       |      |      |      |
|--------------|-------------------|-------|-------|-------|-------|-------|-------|-------|------|------|------|
| Streptomycin | MIC <sub>50</sub> | 128   | 128   | 128   | 128   | 128   | 128   | 128   | 128  | 128  | 128  |
|              | MIC <sub>90</sub> | 2048  | 2048  | 2048  | 2048  | 2048  | 2048  | 2048  | 2048 | 128  | 128  |
|              | Resistance (%)    | 23.0  | 19.1  | 27.5  | 22.4  | 24.2  | 18.6  | 21.1  | 11.8 | 10.0 | 8.8  |
| Tetracycline | MIC <sub>50</sub> | 32    | 32    | 64    | 2     | 2     | 2     | 2     | 2    | 2    | 2    |
|              | MIC <sub>90</sub> | 128   | 128   | 128   | 128   | 128   | 128   | 128   | 128  | 64   | 128  |
|              | Resistance (%)    | 54.1  | 52.0  | 58.8  | 43.5  | 46.5  | 42.2  | 35.8  | 27.6 | 22.5 | 27.5 |
| Tigecycline  | MIC <sub>50</sub> | 0.125 | 0.125 | 0.125 | 0.125 | 0.125 | 0.125 | 0.125 | 0.25 | 0.25 | 0.25 |
|              | MIC <sub>90</sub> | 0.25  | 0.125 | 0.25  | 0.125 | 0.25  | 0.25  | 0.5   | 0.5  | 0.5  | 0.5  |
|              | Resistance (%)    | 0     | 0     | 3.8   | 1.2   | 0     | 7.8   | 20.0  | 22.4 | 12.5 | 12.5 |
| Tylosin      | MIC <sub>50</sub> | 2     | 2     | 2     | 2     | 2     | 2     | 2     | 2    | 2    | 2    |
|              | MIC <sub>90</sub> | 64    | 64    | 64    | 64    | 64    | 64    | 64    | 64   | 64   | 64   |
|              | Resistance (%)    | 24.6  | 31.6  | 22.5  | 17.6  | 13.1  | 19.6  | 22.1  | 11.8 | 16.3 | 13.8 |
| Vancomycin   | MIC <sub>50</sub> | 2     | 2     | 2     | 2     | 2     | 2     | 2     | 2    | 2    | 2    |
|              | MIC <sub>90</sub> | 2     | 2     | 2     | 2     | 2     | 2     | 2     | 2    | 2    | 2    |
|              | Resistance (%)    | 0     | 0     | 0     | 0     | 0     | 0     | 0     | 0    | 0    | 0    |

MIC<sub>50</sub> and MIC<sub>90</sub> are the concentrations (µg/mL) at which 50% and 90% of the isolates were inhibited.

**Table S5B.** The MIC<sub>50</sub> and MIC<sub>90</sub> of the tested antimicrobials against *E. faecalis* (n=1556) isolated from pigs between 2010 and 2019 in Korea.

| Antimicrobials  |                   | 2010<br>(n=88) | 2011<br>(n=216) | 2012<br>(n=145) | 2013<br>(n=166) | 2014<br>(n=164) | 2015<br>(n=173) | 2016<br>(n=200) | 2017<br>(n=155) | 2018<br>(n=143) | 2019<br>(n=106) |
|-----------------|-------------------|----------------|-----------------|-----------------|-----------------|-----------------|-----------------|-----------------|-----------------|-----------------|-----------------|
| Ampicillin      | MIC <sub>50</sub> | 1              | 1               | 1               | 1               | 1               | 1               | 1               | 1               | 1               | 1               |
|                 | MIC <sub>90</sub> | 1              | 1               | 1               | 2               | 2               | 2               | 2               | 1               | 1               | 1               |
|                 | Resistance (%)    | 0              | 0.5             | 0               | 0               | 0               | 0               | 0               | 0               | 0               | 0               |
| Chloramphenicol | MIC <sub>50</sub> | 8              | 16              | 16              | 16              | 16              | 32              | 16              | 32              | 32              | 32              |
|                 | MIC <sub>90</sub> | 32             | 32              | 32              | 32              | 32              | 32              | 32              | 32              | 32              | 32              |
|                 | Resistance (%)    | 45.5           | 48.6            | 44.1            | 48.8            | 46.3            | 55.5            | 41.0            | 61.3            | 55.2            | 56.6            |
| Ciprofloxacin   | MIC <sub>50</sub> | 1              | 1               | 1               | 1               | 1               | 1               | 2               | 1               | 1               | 1               |
|                 | MIC <sub>90</sub> | 2              | 16              | 2               | 4               | 4               | 16              | 4               | 8               | 16              | 2               |
|                 | Resistance (%)    | 9.1            | 13.4            | 9.7             | 10.8            | 12.8            | 16.8            | 17.5            | 15.5            | 18.9            | 7.5             |
| Daptomycin      | MIC <sub>50</sub> | 1              | 1               | 2               | 2               | 2               | 2               | 2               | 2               | 2               | 2               |
|                 | MIC <sub>90</sub> | 2              | 2               | 2               | 2               | 4               | 4               | 4               | 2               | 4               | 2               |
|                 | Resistance (%)    | 0              | 0.5             | 0               | 1.2             | 1.2             | 1.7             | 0.5             | 0               | 0               | 0.9             |
| Erythromycin    | MIC <sub>50</sub> | 64             | 64              | 64              | 64              | 8               | 64              | 16              | 64              | 64              | 64              |
|                 | MIC <sub>90</sub> | 64             | 64              | 64              | 64              | 64              | 64              | 64              | 64              | 64              | 64              |
|                 | Resistance (%)    | 64.8           | 67.1            | 59.3            | 65.1            | 60.4            | 70.5            | 63.5            | 75.5            | 74.8            | 71.7            |
| Florfenicol     | MIC <sub>50</sub> | 2              | 2               | 4               | 4               | 16              | 16              | 4               | 16              | 16              | 16              |
|                 | MIC <sub>90</sub> | 32             | 32              | 32              | 32              | 32              | 32              | 32              | 32              | 32              | 32              |
|                 | Resistance (%)    | 23.9           | 31.5            | 40.7            | 42.8            | 53.7            | 52.6            | 43.5            | 55.5            | 57.3            | 55.7            |
| Gentamicin      | MIC <sub>50</sub> | 128            | 128             | 128             | 128             | 128             | 128             | 128             | 128             | 128             | 128             |
|                 | MIC <sub>90</sub> | 2048           | 2048            | 2048            | 2048            | 2048            | 2048            | 1024            | 2048            | 2048            | 2048            |
|                 | Resistance (%)    | 22.7           | 18.1            | 20.0            | 17.5            | 14.0            | 23.1            | 12.5            | 16.8            | 24.5            | 26.4            |
| Kanamycin       | MIC <sub>50</sub> | 128            | 256             | 128             | 128             | 256             | 128             | 256             | 256             | 2048            | 128             |
|                 | MIC <sub>90</sub> | 2048           | 2048            | 2048            | 2048            | 2048            | 2048            | 2048            | 2048            | 2048            | 2048            |
|                 | Resistance (%)    | 47.7           | 48.6            | 44.8            | 41.0            | 39.0            | 47.4            | 34.5            | 44.5            | 52.4            | 48.1            |
| Linezolid       | MIC <sub>50</sub> | 1              | 1               | 2               | 2               | 2               | 2               | 2               | 2               | 2               | 2               |
|                 | MIC <sub>90</sub> | 1              | 2               | 4               | 4               | 2               | 4               | 4               | 4               | 4               | 4               |
|                 | Resistance (%)    | 0              | 0.5             | 0.7             | 0.6             | 0               | 2.3             | 1.0             | 1.9             | 2.8             | 5.7             |
| Salinomycin     | MIC <sub>50</sub> | 2              | 2               | 2               | 2               | 2               | 2               | 2               | 2               | 2               | 2               |
|                 | MIC <sub>90</sub> | 2              | 2               | 2               | 2               | 2               | 2               | 2               | 2               | 2               | 2               |

|              |                   |       |       |       |       |      |       |      |      |      |      |
|--------------|-------------------|-------|-------|-------|-------|------|-------|------|------|------|------|
|              | Resistance (%)    | 0     | 0     | 0     | 0     | 0    | 0     | 0    | 0    | 0    | 0    |
| Streptomycin | MIC <sub>50</sub> | 1024  | 128   | 2048  | 128   | 256  | 2048  | 128  | 2048 | 2048 | 2048 |
|              | MIC <sub>90</sub> | 2048  | 2048  | 2048  | 2048  | 2048 | 2048  | 2048 | 2048 | 2048 | 2048 |
|              | Resistance (%)    | 51.1  | 45.4  | 51.0  | 45.8  | 48.8 | 60.1  | 46.5 | 52.3 | 59.4 | 52.8 |
| Tetracycline | MIC <sub>50</sub> | 64    | 64    | 64    | 64    | 128  | 128   | 128  | 128  | 64   | 64   |
|              | MIC <sub>90</sub> | 128   | 128   | 128   | 128   | 128  | 128   | 128  | 128  | 128  | 128  |
|              | Resistance (%)    | 75.0  | 80.6  | 80.7  | 77.7  | 76.2 | 83.2  | 73.0 | 81.9 | 79.7 | 72.6 |
| Tigecycline  | MIC <sub>50</sub> | 0.125 | 0.125 | 0.125 | 0.125 | 0.25 | 0.125 | 0.25 | 0.25 | 0.25 | 0.25 |
|              | MIC <sub>90</sub> | 0.25  | 0.125 | 0.25  | 0.25  | 0.25 | 0.25  | 0.5  | 0.5  | 0.5  | 0.5  |
|              | Resistance (%)    | 0     | 0.9   | 4.1   | 3.0   | 1.8  | 9.8   | 33.5 | 27.1 | 16.1 | 13.2 |
| Tylosin      | MIC <sub>50</sub> | 64    | 64    | 64    | 64    | 2    | 64    | 64   | 64   | 64   | 64   |
|              | MIC <sub>90</sub> | 64    | 64    | 64    | 64    | 64   | 64    | 64   | 64   | 64   | 64   |
|              | Resistance (%)    | 64.8  | 67.1  | 59.3  | 65.1  | 59.8 | 70.5  | 62.0 | 73.5 | 74.1 | 71.7 |
| Vancomycin   | MIC <sub>50</sub> | 2     | 2     | 2     | 2     | 2    | 2     | 2    | 2    | 2    | 2    |
|              | MIC <sub>90</sub> | 2     | 2     | 2     | 2     | 4    | 4     | 2    | 2    | 2    | 2    |
|              | Resistance (%)    | 0     | 0     | 0     | 0     | 0    | 0     | 0    | 0    | 0    | 0    |

MIC<sub>50</sub> and MIC<sub>90</sub> are the concentrations (µg/mL) at which 50% and 90% of the isolates were inhibited, respectively.

**Table S5C.** The MIC<sub>50</sub> and MIC<sub>90</sub> of the tested antimicrobials against *E. faecalis* (n=1752) isolated from chickens between 2010 and 2019 in Korea.

| Antimicrobials  |                   | 2010<br>(n=162) | 2011<br>(n=170) | 2012<br>(n=213) | 2013<br>(n=196) | 2014<br>(n=229) | 2015<br>(n=175) | 2016<br>(n=181) | 2017<br>(n=138) | 2018<br>(n=154) | 2019<br>(n=134) |
|-----------------|-------------------|-----------------|-----------------|-----------------|-----------------|-----------------|-----------------|-----------------|-----------------|-----------------|-----------------|
| Ampicillin      | MIC <sub>50</sub> | 1               | 1               | 1               | 1               | 1               | 1               | 1               | 1               | 1               | 1               |
|                 | MIC <sub>90</sub> | 1               | 1               | 1               | 1               | 1               | 2               | 1               | 1               | 1               | 1               |
|                 | Resistance (%)    | 0               | 0               | 0               | 0               | 0               | 0.6             | 0.6             | 0               | 0               | 0               |
| Ciprofloxacin   | MIC <sub>50</sub> | 16              | 16              | 2               | 16              | 2               | 2               | 2               | 2               | 2               | 2               |
|                 | MIC <sub>90</sub> | 16              | 16              | 16              | 16              | 16              | 16              | 16              | 16              | 16              | 16              |
|                 | Resistance (%)    | 60.5            | 54.7            | 46.5            | 53.6            | 47.6            | 47.4            | 47.5            | 42.8            | 36.4            | 47.8            |
| Chloramphenicol | MIC <sub>50</sub> | 8               | 8               | 8               | 8               | 8               | 8               | 8               | 8               | 8               | 8               |
|                 | MIC <sub>90</sub> | 32              | 32              | 32              | 32              | 32              | 32              | 32              | 32              | 32              | 32              |
|                 | Resistance (%)    | 22.8            | 19.4            | 16.9            | 21.4            | 24.0            | 15.4            | 15.5            | 18.8            | 23.4            | 35.1            |
| Daptomycin      | MIC <sub>50</sub> | 1               | 1               | 2               | 2               | 2               | 2               | 2               | 2               | 2               | 2               |
|                 | MIC <sub>90</sub> | 2               | 2               | 2               | 2               | 2               | 2               | 4               | 2               | 2               | 2               |
|                 | Resistance (%)    | 0               | 0.6             | 1.4             | 0               | 2.2             | 0.6             | 0               | 0               | 0               | 0               |
| Erythromycin    | MIC <sub>50</sub> | 32              | 32              | 64              | 64              | 16              | 16              | 64              | 32              | 2               | 8               |
|                 | MIC <sub>90</sub> | 64              | 64              | 64              | 64              | 64              | 64              | 64              | 64              | 64              | 64              |
|                 | Resistance (%)    | 76.5            | 74.7            | 72.8            | 64.3            | 59.4            | 53.7            | 64.1            | 63.0            | 45.5            | 51.5            |
| Florfenicol     | MIC <sub>50</sub> | 2               | 2               | 4               | 4               | 2               | 4               | 4               | 4               | 4               | 4               |
|                 | MIC <sub>90</sub> | 2               | 4               | 4               | 32              | 32              | 16              | 32              | 32              | 32              | 32              |
|                 | Resistance (%)    | 6.2             | 6.5             | 8.5             | 17.3            | 14.8            | 10.9            | 11.6            | 16.7            | 22.7            | 33.6            |
| Gentamicin      | MIC <sub>50</sub> | 128             | 128             | 128             | 128             | 128             | 128             | 128             | 128             | 128             | 128             |
|                 | MIC <sub>90</sub> | 2048            | 1024            | 2048            | 2048            | 128             | 128             | 128             | 1024            | 128             | 256             |
|                 | Resistance (%)    | 14.8            | 11.8            | 15.5            | 11.7            | 8.3             | 4.6             | 6.1             | 10.9            | 9.7             | 9.7             |
| Kanamycin       | MIC <sub>50</sub> | 128             | 128             | 128             | 128             | 256             | 128             | 256             | 128             | 128             | 128             |
|                 | MIC <sub>90</sub> | 2048            | 2048            | 2048            | 2048            | 2048            | 2048            | 2048            | 2048            | 2048            | 2048            |
|                 | Resistance (%)    | 23.5            | 24.7            | 26.8            | 24.0            | 21.4            | 12.0            | 14.4            | 23.2            | 21.4            | 21.6            |
| Linezolid       | MIC <sub>50</sub> | 1               | 1               | 2               | 2               | 1               | 2               | 2               | 2               | 2               | 2               |
|                 | MIC <sub>90</sub> | 1               | 2               | 2               | 4               | 2               | 2               | 2               | 4               | 2               | 4               |
|                 | Resistance (%)    | 0               | 0               | 0.5             | 3.6             | 0.4             | 1.1             | 0.6             | 2.2             | 1.3             | 2.2             |
| Salinomycin     | MIC <sub>50</sub> | 2               | 2               | 2               | 2               | 2               | 2               | 2               | 2               | 2               | 2               |
|                 | MIC <sub>90</sub> | 4               | 4               | 4               | 4               | 4               | 4               | 4               | 4               | 2               | 2               |



|              | Resistance (%)    | 0     | 0.6   | 2.3   | 3.1   | 6.1   | 4.6   | 7.7  | 0.7  | 0    | 0    |
|--------------|-------------------|-------|-------|-------|-------|-------|-------|------|------|------|------|
| Streptomycin | MIC <sub>50</sub> | 1024  | 128   | 128   | 128   | 128   | 128   | 128  | 128  | 128  | 128  |
|              | MIC <sub>90</sub> | 2048  | 2048  | 2048  | 2048  | 2048  | 2048  | 2048 | 2048 | 2048 | 2048 |
|              | Resistance (%)    | 31.5  | 30.6  | 31.9  | 33.2  | 31.4  | 30.9  | 35.9 | 27.5 | 32.5 | 32.1 |
| Tetracycline | MIC <sub>50</sub> | 128   | 128   | 128   | 128   | 128   | 128   | 128  | 128  | 64   | 64   |
|              | MIC <sub>90</sub> | 128   | 128   | 128   | 128   | 128   | 128   | 128  | 128  | 128  | 128  |
|              | Resistance (%)    | 79.0  | 85.3  | 78.4  | 77.0  | 80.8  | 76.0  | 77.9 | 71.0 | 66.2 | 61.9 |
| Tigecycline  | MIC <sub>50</sub> | 0.125 | 0.125 | 0.125 | 0.125 | 0.125 | 0.125 | 0.25 | 0.25 | 0.25 | 0.25 |
|              | MIC <sub>90</sub> | 0.25  | 0.125 | 0.25  | 0.25  | 0.25  | 0.5   | 0.5  | 0.5  | 0.25 | 0.25 |
|              | Resistance (%)    | 0     | 1.2   | 1.4   | 3.6   | 2.6   | 12.0  | 37.6 | 24.6 | 21.4 | 8.2  |
| Tylosin      | MIC <sub>50</sub> | 64    | 64    | 64    | 64    | 2     | 64    | 64   | 64   | 2    | 32   |
|              | MIC <sub>90</sub> | 64    | 64    | 64    | 64    | 64    | 64    | 64   | 64   | 64   | 64   |
|              | Resistance (%)    | 81.5  | 78.2  | 72.8  | 63.8  | 59.4  | 53.1  | 63.5 | 62.3 | 46.1 | 51.5 |
| Vancomycin   | MIC <sub>50</sub> | 2     | 2     | 2     | 2     | 2     | 2     | 2    | 2    | 2    | 2    |
|              | MIC <sub>90</sub> | 2     | 2     | 4     | 2     | 4     | 4     | 2    | 2    | 2    | 2    |
|              | Resistance (%)    | 0     | 0     | 0     | 0     | 0     | 0     | 0    | 0    | 0    | 0    |

MIC<sub>50</sub> and MIC<sub>90</sub> are the concentrations (µg/mL) at which 50% and 90% of the isolates were inhibited, respectively.

**Table S6.** Antimicrobial resistance rate in *E. faecium* (n=572) isolated from cattle between 2010 and 2019 in Korea.

| Antimicrobials            | 2010<br>(n=25) | 2011<br>(n=72) | 2012<br>(n=53) | 2013<br>(n=46) | 2014<br>(n=73) | 2015<br>(n=51) | 2016<br>(n=57) | 2017<br>(n=60) | 2018<br>(n=78) | 2019<br>(n=57) | Total<br>(n=572) | P-value |
|---------------------------|----------------|----------------|----------------|----------------|----------------|----------------|----------------|----------------|----------------|----------------|------------------|---------|
| Ampicillin                | 0 (0)          | 0 (0)          | 0 (0)          | 2.2 (1)        | 0 (0)          | 0 (0)          | 0 (0)          | 0 (0)          | 0 (0)          | 1.8 (1)        | 0.3 (2)          | 0.5649  |
| Chloramphenicol           | 8.0 (2)        | 1.4 (1)        | 0 (0)          | 2.2 (1)        | 2.7 (2)        | 5.9 (3)        | 1.8 (1)        | 0 (0)          | 1.3 (1)        | 3.5 (2)        | 2.3 (13)         | 0.4287  |
| Ciprofloxacin             | 20.0 (5)       | 9.7 (7)        | 15.1 (8)       | 17.4 (8)       | 16.4 (12)      | 25.5 (13)      | 43.9 (25)      | 28.3 (17)      | 21.8 (17)      | 35.1 (20)      | 23.1 (132)       | 0.0329  |
| Daptomycin                | 0 (0)          | 2.8 (2)        | 1.9 (1)        | 6.5 (3)        | 2.7 (2)        | 3.9 (2)        | 19.3 (11)      | 1.7 (1)        | 5.1 (4)        | 10.5 (6)       | 5.6 (32)         | 0.1596  |
| Erythromycin              | 40.0(10)       | 30.6 (22)      | 13.2 (7)       | 6.5 (3)        | 6.8 (5)        | 9.8 (5)        | 8.8 (5)        | 30.0 (18)      | 34.6 (27)      | 21.1 (12)      | 19.9 (114)       | 0.8488  |
| Florfenicol               | 8.0 (2)        | 2.8 (2)        | 0 (0)          | 0 (0)          | 2.7 (2)        | 0 (0)          | 0 (0)          | 1.7 (1)        | 1.3 (1)        | 1.8 (1)        | 1.6 (9)          | 0.1859  |
| Gentamicin                | 4.0 (1)        | 0 (0)          | 0 (0)          | 0 (0)          | 0 (0)          | 0 (0)          | 0 (0)          | 0 (0)          | 0 (0)          | 0 (0)          | 0.2 (1)          | 0.1215  |
| Kanamycin                 | 12.0 (3)       | 26.4 (19)      | 1.9 (1)        | 8.7 (4)        | 2.7 (2)        | 3.9 (2)        | 0 (0)          | 3.3 (2)        | 1.3 (1)        | 3.5 (2)        | 6.3 (36)         | 0.0522  |
| Linezolid                 | 0 (0)          | 0 (0)          | 0 (0)          | 0 (0)          | 1.4 (1)        | 0 (0)          | 1.8 (1)        | 0 (0)          | 0 (0)          | 0 (0)          | 0.3 (2)          | 0.767   |
| Quinupristin/dalfopristin | 16.0 (4)       | 1.4 (1)        | 17.0 (9)       | 19.6 (9)       | 8.2 (6)        | 15.7 (8)       | 0 (0)          | 1.7 (1)        | 6.4 (5)        | 12.3 (7)       | 8.7 (50)         | 0.3691  |
| Salinomycin               | 0 (0)          | 0 (0)          | 1.9 (1)        | 0 (0)          | 0 (0)          | 0 (0)          | 0 (0)          | 0 (0)          | 0 (0)          | 0 (0)          | 0.2 (1)          | 0.4161  |
| Streptomycin              | 32.0 (8)       | 11.1 (8)       | 5.7 (3)        | 6.5 (3)        | 8.2 (6)        | 9.8 (5)        | 1.8 (1)        | 1.7 (1)        | 1.3 (1)        | 5.3 (3)        | 6.8 (39)         | 0.0249  |
| Tetracycline              | 64.0(16)       | 47.2 (34)      | 30.2 (16)      | 15.2 (7)       | 26.0 (19)      | 21.6 (11)      | 35.1 (20)      | 16.7 (10)      | 9.0 (7)        | 14.0 (8)       | 25.9 (148)       | 0.0071  |
| Tigecycline               | 4.0 (1)        | 1.4 (1)        | 1.9 (1)        | 0 (0)          | 1.4 (1)        | 7.8 (4)        | 10.5 (6)       | 11.7 (7)       | 15.4 (12)      | 10.5 (6)       | 6.8 (39)         | 0.0031  |
| Tylosin                   | 32.0 (8)       | 8.3 (6)        | 3.8 (2)        | 4.3 (2)        | 4.1 (3)        | 2.0 (1)        | 1.8 (1)        | 3.3 (2)        | 1.3 (1)        | 3.5 (2)        | 4.9 (28)         | 0.0489  |
| Vancomycin                | 0 (0)          | 0 (0)          | 0 (0)          | 0 (0)          | 0 (0)          | 0 (0)          | 0 (0)          | 0 (0)          | 0 (0)          | 0(0)           | 0 (0)            | -       |
| MDR                       | 32.0 (8)       | 12.5 (9)       | 7.5 (4)        | 8.7 (4)        | 5.5 (4)        | 11.8 (6)       | 10.5 (6)       | 3.3 (2)        | 1.3 (1)        | 8.8 (5)        | 8.6 (49)         | 0.0448  |

MDR, multidrug resistance;  $P < 0.05$  was considered significant change in antibiotic resistance trend

**Table S7.** Antimicrobial resistance rate in *E. faecium* (n=1385) isolated from pigs between 2010 and 2019 in Korea.

| Antimicrobials            | 2010<br>(n=60) | 2011<br>(n=163) | 2012<br>(n=148) | 2013<br>(n=127) | 2014<br>(n=144) | 2015<br>(n=142) | 2016<br>(n=152) | 2017<br>(n=139) | 2018<br>(n=197) | 2019<br>(n=113) | Total<br>(n=1385) | P-value |
|---------------------------|----------------|-----------------|-----------------|-----------------|-----------------|-----------------|-----------------|-----------------|-----------------|-----------------|-------------------|---------|
| Ampicillin                | 0 (0)          | 0 (0)           | 0 (0)           | 0.8 (1)         | 0 (0)           | 0 (0)           | 0 (0)           | 0 (0)           | 0 (0)           | 0 (0)           | 0.1 (1)           | 0.6305  |
| Chloramphenicol           | 5.0 (3)        | 2.5 (4)         | 5.4 (8)         | 3.9 (5)         | 11.1 (16)       | 12.0 (17)       | 6.6 (10)        | 7.2 (10)        | 7.1 (14)        | 7.1 (8)         | 6.9 (95)          | 0.2141  |
| Ciprofloxacin             | 23.3 (14)      | 6.7 (11)        | 12.2 (18)       | 11.0 (14)       | 11.8 (17)       | 9.2 (13)        | 29.6 (45)       | 12.9 (18)       | 12.2 (24)       | 13.3 (15)       | 13.6 (189)        | 0.9697  |
| Daptomycin                | 0 (0)          | 0 (0)           | 8.1 (12)        | 3.1 (4)         | 2.8 (4)         | 7.7 (11)        | 25.7 (39)       | 1.4 (2)         | 5.6 (11)        | 10.6 (12)       | 6.9 (95)          | 0.2304  |
| Erythromycin              | 33.3 (20)      | 25.8 (42)       | 16.9 (25)       | 12.6 (16)       | 15.3 (22)       | 34.5 (49)       | 43.4 (66)       | 38.8 (54)       | 48.2 (95)       | 41.6 (47)       | 31.5 (436)        | 0.0402  |
| Florfenicol               | 10.0 (6)       | 4.9 (8)         | 8.1 (12)        | 3.9 (5)         | 8.3 (12)        | 13.4 (19)       | 9.2 (14)        | 10.8 (15)       | 8.6 (17)        | 7.1 (8)         | 8.4 (116)         | 0.5254  |
| Gentamicin                | 0 (0)          | 1.2 (2)         | 0.7 (1)         | 1.6 (2)         | 1.4 (2)         | 0 (0)           | 1.3 (2)         | 0 (0)           | 0 (0)           | 0.9 (1)         | 0.7 (10)          | 0.639   |
| Kanamycin                 | 21.7 (13)      | 10.4 (17)       | 7.4 (11)        | 9.4 (12)        | 8.3 (12)        | 7.7 (11)        | 11.8 (18)       | 6.5 (9)         | 8.6 (17)        | 10.6 (12)       | 9.5 (132)         | 0.1739  |
| Linezolid                 | 0 (0)          | 0 (0)           | 0 (0)           | 0 (0)           | 0 (0)           | 0 (0)           | 0 (0)           | 0 (0)           | 0 (0)           | 0 (0)           | 0 (0)             |         |
| Quinupristin/dalfopristin | 8.3 (5)        | 3.1 (5)         | 25.0 (37)       | 11.8 (15)       | 11.1 (16)       | 17.6 (25)       | 9.2 (14)        | 5.0 (7)         | 10.7 (21)       | 17.7 (20)       | 11.9 (165)        | 0.7784  |
| Salinomycin               | 0 (0)          | 0 (0)           | 0.7 (1)         | 0.8 (1)         | 0.7 (1)         | 0 (0)           | 0.7 (1)         | 0 (0)           | 0.5 (1)         | 0 (0)           | 0.4 (5)           | 0.8905  |
| Streptomycin              | 28.3 (17)      | 7.4 (12)        | 12.8 (19)       | 11.8 (15)       | 11.1 (16)       | 14.8 (21)       | 12.5 (19)       | 12.2 (17)       | 10.7 (21)       | 13.3 (15)       | 12.4 (172)        | 0.3063  |
| Tetracycline              | 36.7 (22)      | 19.0 (31)       | 23.0 (34)       | 15.0 (19)       | 19.4 (28)       | 21.1 (30)       | 27.0 (41)       | 17.3 (24)       | 16.2 (32)       | 15.9 (18)       | 20.1 (279)        | 0.0998  |
| Tigecycline               | 10.0 (6)       | 0.6 (1)         | 2.0 (3)         | 3.1 (4)         | 0.7 (1)         | 2.8 (4)         | 7.2 (11)        | 5.8 (8)         | 17.3 (34)       | 8.0 (9)         | 5.8 (81)          | 0.1708  |
| Tylosin                   | 23.3 (14)      | 7.4 (12)        | 12.8 (19)       | 11.0 (14)       | 12.5 (18)       | 16.2 (23)       | 14.5 (22)       | 13.7 (19)       | 17.3 (34)       | 14.2 (16)       | 13.8 (191)        | 0.9416  |
| Vancomycin                | 0 (0)          | 0 (0)           | 0 (0)           | 0 (0)           | 0 (0)           | 0 (0)           | 0 (0)           | 0 (0)           | 0 (0)           | 0 (0)           | 0 (0)             |         |
| MDR                       | 25.0 (15)      | 7.4 (12)        | 14.2 (21)       | 11.0 (14)       | 16.0 (23)       | 16.9 (24)       | 23.0 (35)       | 15.8 (22)       | 16.8 (33)       | 15.0 (17)       | 15.6 (216)        | 0.8381  |

MDR, multidrug resistance;  $P < 0.05$  was considered significant change in antibiotic resistance trend.

**Table S8.** Antimicrobial resistance rate in *E. faecium* (n=1403) isolated from chickens between 2010 and 2019 in Korea.

| Antimicrobials            | 2010<br>(n=77) | 2011<br>(n=87) | 2012<br>(n=168) | 2013<br>(n=134) | 2014<br>(n=240) | 2015<br>(n=166) | 2016<br>(n=162) | 2017<br>(n=90) | 2018<br>(n=168) | 2019<br>(n=111) | Total<br>(n=1403) | P-value |
|---------------------------|----------------|----------------|-----------------|-----------------|-----------------|-----------------|-----------------|----------------|-----------------|-----------------|-------------------|---------|
| Ampicillin                | 13.0 (10)      | 12.6 (11)      | 9.5 (16)        | 10.4 (14)       | 8.3 (20)        | 12.7 (21)       | 4.3 (7)         | 12.2 (11)      | 13.7 (23)       | 24.3 (27)       | 11.4 (160)        | 0.2664  |
| Chloramphenicol           | 22.1 (17)      | 19.5 (17)      | 16.1 (27)       | 15.7 (21)       | 19.2 (46)       | 14.5 (24)       | 14.8 (24)       | 12.2 (11)      | 26.2 (44)       | 29.7 (33)       | 18.8 (264)        | 0.4147  |
| Ciprofloxacin             | 74.0 (57)      | 75.9 (66)      | 66.7 (112)      | 70.9 (95)       | 68.3 (164)      | 78.9 (131)      | 65.4 (106)      | 62.2 (56)      | 56.5 (95)       | 64.0 (71)       | 67.9 (953)        | 0.0283  |
| Daptomycin                | 0 (0)          | 1.1 (1)        | 13.1 (22)       | 8.2 (11)        | 9.6 (23)        | 11.4 (19)       | 19.8 (32)       | 6.7 (6)        | 11.9 (20)       | 19.8 (22)       | 11.1 (156)        | 0.0212  |
| Erythromycin              | 84.4 (65)      | 74.7 (65)      | 55.4 (93)       | 67.2 (90)       | 59.6 (143)      | 57.8 (96)       | 53.7 (87)       | 50.0(45)       | 45.2 (76)       | 67.6 (75)       | 59.5 (835)        | 0.0392  |
| Florfenicol               | 24.7 (19)      | 21.8 (19)      | 14.9 (25)       | 14.2 (19)       | 18.8 (45)       | 15.1 (25)       | 13.0 (21)       | 12.2 (11)      | 26.2 (44)       | 30.6 (34)       | 18.7 (262)        | 0.6146  |
| Gentamicin                | 10.4 (8)       | 1.1 (1)        | 3.6 (6)         | 0 (0)           | 1.7 (4)         | 2.4 (4)         | 1.9 (3)         | 2.2 (2)        | 0 (0)           | 4.5 (5)         | 2.4 (33)          | 0.2893  |
| Kanamycin                 | 20.8 (16)      | 3.4 (3)        | 12.5 (21)       | 9.7 (13)        | 11.7 (28)       | 11.4 (19)       | 6.2 (10)        | 8.9 (8)        | 7.7 (13)        | 9.9 (11)        | 10.1 (142)        | 0.2723  |
| Linezolid                 | 3.9 (3)        | 0 (0)          | 1.2 (2)         | 1.5 (2)         | 7.1 (17)        | 6.6 (11)        | 6.8 (11)        | 3.3 (3)        | 6.5 (11)        | 11.7 (13)       | 5.2 (73)          | 0.0158  |
| Quinupristin/dalfopristin | 39.0 (30)      | 26.4 (23)      | 44.0 (74)       | 34.3 (46)       | 29.2 (70)       | 34.3 (57)       | 24.1 (39)       | 6.7 (6)        | 14.9 (25)       | 20.7 (23)       | 28.0 (393)        | 0.014   |
| Salinomycin               | 2.6 (2)        | 6.9 (6)        | 11.3 (19)       | 3.7 (5)         | 24.6 (59)       | 17.5 (29)       | 13.0(21)        | 2.2 (2)        | 3.0 (5)         | 5.4 (6)         | 11.0 (154)        | 0.8571  |
| Streptomycin              | 50.6 (39)      | 46.0 (40)      | 41.1 (69)       | 44.0 (59)       | 30.4 (73)       | 38.0 (63)       | 16.7 (27)       | 23.3 (21)      | 13.1 (22)       | 17.1 (19)       | 30.8 (432)        | 0.0001  |
| Tetracycline              | 87.0 (67)      | 82.8 (72)      | 70.8 (119)      | 77.6 (104)      | 62.9 (151)      | 63.9 (106)      | 48.8 (79)       | 52.2 (47)      | 42.9 (72)       | 44.1 (49)       | 61.7 (866)        | 0       |
| Tigecycline               | 3.9 (3)        | 1.1 (1)        | 1.8 (3)         | 3.0 (4)         | 4.6 (11)        | 9.6 (16)        | 9.3 (15)        | 10.0 (9)       | 5.4 (9)         | 5.4 (6)         | 5.5 (77)          | 0.0581  |
| Tylosin                   | 84.4 (65)      | 74.7 (65)      | 51.8 (87)       | 64.9 (87)       | 58.8 (141)      | 51.2 (85)       | 38.3 (62)       | 41.1 (37)      | 35.7 (60)       | 48.6 (54)       | 53.0(743)         | 0.0019  |
| Vancomycin                | 0 (0)          | 0 (0)          | 0 (0)           | 0 (0)           | 0 (0)           | 0 (0)           | 0 (0)           | 0 (0)          | 0 (0)           | 0 (0)           | 0 (0)             |         |
| MDR                       | 84.4 (65)      | 77.0 (67)      | 62.5 (105)      | 70.9 (95)       | 65.4 (157)      | 65.7 (109)      | 50.0 (81)       | 46.7 (42)      | 39.9 (67)       | 59.5 (66)       | 60.9 (854)        | 0.0027  |

MDR, multidrug resistance;  $P < 0.05$  was considered significant change in antibiotic resistance trend.

**Table S9.** Antimicrobial resistance rate in *E. faecalis* (n=910) isolated from cattle between 2010 and 2019 in Korea.

| Antimicrobials  | 2010<br>(n=61) | 2011<br>(n=152) | 2012<br>(n=80) | 2013<br>(n=85) | 2014<br>(n=99) | 2015<br>(n=102) | 2016<br>(n=95) | 2017<br>(n=76) | 2018<br>(n=80) | 2019<br>(n=80) | Total<br>(n=910) | P-value |
|-----------------|----------------|-----------------|----------------|----------------|----------------|-----------------|----------------|----------------|----------------|----------------|------------------|---------|
| Ampicillin      | 0 (0)          | 0 (0)           | 0 (0)          | 0 (0)          | 0 (0)          | 0 (0)           | 0 (0)          | 0 (0)          | 0 (0)          | 0 (0)          | 0 (0)            |         |
| Chloramphenicol | 16.4 (10)      | 15.1 (23)       | 16.3 (13)      | 3.5 (3)        | 11.1 (11)      | 19.6 (20)       | 10.5 (10)      | 7.9 (6)        | 6.3 (5)        | 11.3 (9)       | 12.1 (110)       | 0.2064  |
| Ciprofloxacin   | 0 (0)          | 9.9 (15)        | 8.8 (7)        | 9.4 (8)        | 8.1 (8)        | 12.7 (13)       | 13.7 (13)      | 3.9 (3)        | 3.8 (3)        | 2.5 (2)        | 7.9 (72)         | 0.7617  |
| Daptomycin      | 0 (0)          | 0.7 (1)         | 1.3 (1)        | 0 (0)          | 2.0 (2)        | 2.0 (2)         | 3.2 (3)        | 1.3 (1)        | 1.3 (1)        | 1.3 (1)        | 1.3 (12)         | 0.1626  |
| Erythromycin    | 24.6 (15)      | 32.2 (49)       | 23.8 (19)      | 17.6 (15)      | 13.1 (13)      | 19.6 (20)       | 23.2 (22)      | 11.8 (9)       | 16.3 (13)      | 13.8 (11)      | 20.4 (186)       | 0.0224  |
| Florfenicol     | 0 (0)          | 0.7 (1)         | 6.3 (5)        | 3.5 (3)        | 3.0 (3)        | 8.8 (9)         | 8.4 (8)        | 5.3 (4)        | 3.8 (3)        | 6.3 (5)        | 4.5 (41)         | 0.0795  |
| Gentamicin      | 13.1 (8)       | 8.6 (13)        | 8.8 (7)        | 7.1 (6)        | 9.1 (9)        | 5.9 (6)         | 7.4 (7)        | 2.6 (2)        | 5.0 (4)        | 7.5 (6)        | 7.5 (68)         |         |
| Kanamycin       | 14.8 (9)       | 15.8 (24)       | 16.3 (13)      | 15.3 (13)      | 11.1 (11)      | 10.8 (11)       | 18.9 (18)      | 5.3 (4)        | 12.5 (10)      | 11.3 (9)       | 13.4 (122)       | 0.1646  |
| Linezolid       | 0 (0)          | 0 (0)           | 0 (0)          | 0 (0)          | 0 (0)          | 2.0 (2)         | 0 (0)          | 0 (0)          | 0 (0)          | 0 (0)          | 0.2 (2)          | 0.8735  |
| Salinomycin     | 0 (0)          | 0 (0)           | 0 (0)          | 0 (0)          | 0 (0)          | 0 (0)           | 0 (0)          | 0 (0)          | 0 (0)          | 0 (0)          | 0 (0)            |         |
| Streptomycin    | 23.0 (14)      | 19.1 (29)       | 27.5 (22)      | 22.4 (19)      | 24.2 (24)      | 18.6 (19)       | 21.1 (20)      | 11.8 (9)       | 10.0 (8)       | 8.8 (7)        | 18.8 (171)       | 0.0051  |
| Tetracycline    | 54.1 (33)      | 52.0 (79)       | 58.8 (47)      | 43.5 (37)      | 46.5 (46)      | 42.2 (43)       | 35.8 (34)      | 27.6 (21)      | 22.5 (18)      | 27.5 (22)      | 41.8 (380)       | 0.0001  |
| Tigecycline     | 0 (0)          | 0 (0)           | 3.8 (3)        | 1.2 (1)        | 0 (0)          | 7.8 (8)         | 20.0 (19)      | 22.4 (17)      | 12.5 (10)      | 12.5 (10)      | 7.5 (68)         | 0.0088  |
| Tylosin         | 24.6 (15)      | 31.6 (48)       | 22.5 (18)      | 17.6 (15)      | 13.1 (13)      | 19.6 (20)       | 22.1 (21)      | 11.8 (9)       | 16.3 (13)      | 13.8 (11)      | 20.1 (183)       | 0.0197  |
| Vancomycin      | 0 (0)          | 0 (0)           | 0 (0)          | 0 (0)          | 0 (0)          | 0 (0)           | 0 (0)          | 0 (0)          | 0 (0)          | 0 (0)          | 0 (0)            |         |
| MDR             | 21.3 (13)      | 24.3 (37)       | 28.8 (23)      | 17.6 (15)      | 16.2 (16)      | 25.5 (26)       | 20.0 (19)      | 11.8 (9)       | 12.5 (10)      | 13.8 (11)      | 19.7 (179)       | 0.0269  |

MDR, multidrug resistance;  $P < 0.05$  was considered significant change in antibiotic resistance trend.

**Table S10.** Antimicrobial resistance rate in *E. faecalis* (n=1556) isolated from pigs between 2010 and 2019 in Korea.

| Antimicrobials  | 2010<br>(n=88) | 2011<br>(n=216) | 2012<br>(n=145) | 2013<br>(n=166) | 2014<br>(n=164) | 2015<br>(n=173) | 2016<br>(n=200) | 2017<br>(n=155) | 2018<br>(n=143) | 2019<br>(n=106) | Total<br>(n=1556) | P-value |
|-----------------|----------------|-----------------|-----------------|-----------------|-----------------|-----------------|-----------------|-----------------|-----------------|-----------------|-------------------|---------|
| Ampicillin      | 0 (0)          | 0.5 (1)         | 0 (0)           | 0 (0)           | 0 (0)           | 0 (0)           | 0 (0)           | 0 (0)           | 0 (0)           | 0 (0)           | 0.1 (1)           | 0.2441  |
| Chloramphenicol | 45.5 (40)      | 48.6 (105)      | 44.1 (64)       | 48.8 (81)       | 46.3 (76)       | 55.5 (96)       | 41.0 (82)       | 61.3 (95)       | 55.2 (79)       | 56.6 (60)       | 50.0 (778)        | 0.0586  |
| Ciprofloxacin   | 9.1 (8)        | 13.4 (29)       | 9.7 (14)        | 10.8 (18)       | 12.8 (21)       | 16.8 (29)       | 17.5 (35)       | 15.5 (24)       | 18.9 (27)       | 7.5 (8)         | 13.7 (213)        | 0.2981  |
| Daptomycin      | 0 (0)          | 0.5 (1)         | 0 (0)           | 1.2 (2)         | 1.2 (2)         | 1.7 (3)         | 0.5 (1)         | 0 (0)           | 0 (0)           | 0.9 (1)         | 0.6 (10)          | 0.7842  |
| Erythromycin    | 64.8 (57)      | 67.1 (145)      | 59.3 (86)       | 65.1 (108)      | 60.4 (99)       | 70.5 (122)      | 63.5 (127)      | 75.5 (117)      | 74.8 (107)      | 71.7 (76)       | 67.1 (1044)       | 0.0404  |
| Florfenicol     | 23.9 (21)      | 31.5 (68)       | 40.7 (59)       | 42.8 (71)       | 53.7 (88)       | 52.6 (91)       | 43.5 (87)       | 55.5 (86)       | 57.3 (82)       | 55.7 (59)       | 45.8 (712)        | 0.0009  |
| Gentamicin      | 22.7 (20)      | 18.1 (39)       | 20.0 (29)       | 17.5 (29)       | 14.0 (23)       | 23.1 (40)       | 12.5 (25)       | 16.8 (26)       | 24.5 (35)       | 26.4 (28)       | 18.9 (294)        | 0.5306  |
| Kanamycin       | 47.7 (42)      | 48.6 (105)      | 44.8 (65)       | 41.0 (68)       | 39.0 (64)       | 47.4 (82)       | 34.5 (69)       | 44.5 (69)       | 52.4 (75)       | 48.1 (51)       | 44.3 (690)        | 0.8663  |
| Linezolid       | 0 (0)          | 0.5 (1)         | 0.7 (1)         | 0.6 (1)         | 0 (0)           | 2.3 (4)         | 1.0 (2)         | 1.9 (3)         | 2.8 (4)         | 5.7 (6)         | 1.4 (22)          | 0.0044  |
| Salinomycin     | 0 (0)          | 0 (0)           | 0 (0)           | 0 (0)           | 0 (0)           | 0 (0)           | 0 (0)           | 0 (0)           | 0 (0)           | 0 (0)           | 0 (0)             |         |
| Streptomycin    | 51.1 (45)      | 45.4 (98)       | 51.0 (74)       | 45.8 (76)       | 48.8 (80)       | 60.1 (104)      | 46.5 (93)       | 52.3 (81)       | 59.4 (85)       | 52.8 (56)       | 50.9 (792)        | 0.167   |
| Tetracycline    | 75.0 (66)      | 80.6 (174)      | 80.7 (117)      | 77.7 (129)      | 76.2 (125)      | 83.2 (144)      | 73.0 (146)      | 81.9 (127)      | 79.7 (114)      | 72.6 (77)       | 78.3 (1219)       | 0.6947  |
| Tigecycline     | 0 (0)          | 0.9 (2)         | 4.1 (6)         | 3.0 (5)         | 1.8 (3)         | 9.8 (17)        | 33.5 (67)       | 27.1 (42)       | 16.1 (23)       | 13.2 (14)       | 11.5 (179)        | 0.043   |
| Tylosin         | 64.8 (57)      | 67.1 (145)      | 59.3 (86)       | 65.1 (108)      | 59.8 (98)       | 70.5 (122)      | 62.0 (124)      | 73.5 (114)      | 74.1 (106)      | 71.7 (76)       | 66.6 (1036)       | 0.0593  |
| Vancomycin      | 0 (0)          | 0 (0)           | 0 (0)           | 0 (0)           | 0 (0)           | 0 (0)           | 0 (0)           | 0 (0)           | 0 (0)           | 0 (0)           | 0 (0)             |         |
| MDR             | 56.8 (50)      | 59.7 (129)      | 57.2 (83)       | 59.0 (98)       | 59.8 (98)       | 74.0 (128)      | 59.5 (119)      | 72.3 (112)      | 69.9 (100)      | 68.9 (73)       | 63.6 (990)        | 0.0141  |

MDR, multidrug resistance;  $P < 0.05$  was considered significant change in antibiotic resistance trend.

**Table S11.** Antimicrobial resistance rate in *E. faecalis* (n=1752) isolated from chickens between 2010 and 2019 in Korea.

| Antimicrobials  | 2010<br>(n=162) | 2011<br>(n=170) | 2012<br>(n=213) | 2013<br>(n=196) | 2014<br>(n=229) | 2015<br>(n=175) | 2016<br>(n=181) | 2017<br>(n=138) | 2018<br>(n=154) | 2019<br>(n=134) | Total<br>(n=1752) | P-value |
|-----------------|-----------------|-----------------|-----------------|-----------------|-----------------|-----------------|-----------------|-----------------|-----------------|-----------------|-------------------|---------|
| Ampicillin      | 0 (0)           | 0 (0)           | 0 (0)           | 0 (0)           | 0 (0)           | 0.6 (1)         | 0.6 (1)         | 0 (0)           | 0 (0)           | 0 (0)           | 0.1 (2)           | 0.6305  |
| Chloramphenicol | 22.8 (37)       | 19.4 (33)       | 16.9 (36)       | 21.4 (42)       | 24.0 (55)       | 15.4 (27)       | 15.5 (28)       | 18.8 (26)       | 23.4 (36)       | 35.1 (47)       | 20.9 (367)        | 0.2708  |
| Ciprofloxacin   | 60.5 (98)       | 54.7 (93)       | 46.5 (99)       | 53.6 (105)      | 47.6 (109)      | 47.4 (83)       | 47.5 (86)       | 42.8 (59)       | 36.4 (56)       | 47.8 (64)       | 48.6 (852)        | 0.0085  |
| Daptomycin      | 0 (0)           | 0.6 (1)         | 1.4 (3)         | 0 (0)           | 2.2 (5)         | 0.6 (1)         | 0 (0)           | 0 (0)           | 0 (0)           | 0 (0)           | 0.6 (10)          | 0.3858  |
| Erythromycin    | 76.5 (124)      | 74.7 (127)      | 72.8 (155)      | 64.3 (126)      | 59.4 (136)      | 53.7 (94)       | 64.1 (116)      | 63.0 (87)       | 45.5 (70)       | 51.5 (69)       | 63.0 (1104)       | 0.0013  |
| Florfenicol     | 6.2 (10)        | 6.5 (11)        | 8.5 (18)        | 17.3 (34)       | 14.8 (34)       | 10.9 (19)       | 11.6 (21)       | 16.7 (23)       | 22.7 (35)       | 33.6 (45)       | 14.3 (250)        | 0.0029  |
| Gentamicin      | 14.8 (24)       | 11.8 (20)       | 15.5 (33)       | 11.7 (23)       | 8.3 (19)        | 4.6 (8)         | 6.1 (11)        | 10.9 (15)       | 9.7 (15)        | 9.7 (13)        | 10.3 (181)        | 0.0961  |
| Kanamycin       | 23.5 (38)       | 24.7 (42)       | 26.8 (57)       | 24.0 (47)       | 21.4 (49)       | 12.0 (21)       | 14.4 (26)       | 23.2 (32)       | 21.4 (33)       | 21.6 (29)       | 21.3 (374)        | 0.2764  |
| Linezolid       | 0 (0)           | 0 (0)           | 0.5 (1)         | 3.6 (7)         | 0.4 (1)         | 1.1 (2)         | 0.6 (1)         | 2.2 (3)         | 1.3 (2)         | 2.2 (3)         | 1.1 (20)          | 0.1772  |
| Salinomycin     | 0 (0)           | 0.6 (1)         | 2.3 (5)         | 3.1 (6)         | 6.1 (14)        | 4.6 (8)         | 7.7 (14)        | 0.7 (1)         | 0 (0)           | 0 (0)           | 2.8 (49)          | 0.9986  |
| Streptomycin    | 31.5 (51)       | 30.6 (52)       | 31.9 (68)       | 33.2 (65)       | 31.4 (72)       | 30.9 (54)       | 35.9 (65)       | 27.5 (38)       | 32.5 (50)       | 32.1 (43)       | 31.8 (558)        | 0.9203  |
| Tetracycline    | 79.0 (128)      | 85.3 (145)      | 78.4 (167)      | 77.0 (151)      | 80.8 (185)      | 76.0 (133)      | 77.9 (141)      | 71.0 (98)       | 66.2 (102)      | 61.9 (83)       | 76.1 (1333)       | 0.0017  |
| Tigecycline     | 0 (0)           | 1.2 (2)         | 1.4 (3)         | 3.6 (7)         | 2.6 (6)         | 12.0 (21)       | 37.6 (68)       | 24.6 (34)       | 21.4 (33)       | 8.2 (11)        | 10.6 (185)        | 0.0457  |
| Tylosin         | 81.5 (132)      | 78.2 (133)      | 72.8 (155)      | 63.8 (125)      | 59.4 (136)      | 53.1 (93)       | 63.5 (115)      | 62.3 (86)       | 46.1 (71)       | 51.5 (69)       | 63.6 (1115)       | 0.0007  |
| Vancomycin      | 0 (0)           | 0 (0)           | 0 (0)           | 0 (0)           | 0 (0)           | 0 (0)           | 0 (0)           | 0 (0)           | 0 (0)           | 0 (0)           | 0 (0)             | -       |
| MDR             | 72.8 (118)      | 68.2 (116)      | 62.4 (133)      | 60.2 (118)      | 58.1 (133)      | 54.3 (95)       | 62.4 (113)      | 58.0 (80)       | 46.8 (72)       | 50.7 (68)       | 59.7 (1046)       | 0.001   |

MDR, multidrug resistance;  $P < 0.05$  was considered significant change in antibiotic resistance trend.
